1 **UVB modifies skin immune-stroma cross-talk and promotes effector T cell**  
2 **recruitment during cryptic *Leishmania donovani* infection**

3

4 Marcela Montes de Oca<sup>1,5,6</sup>, Shoumit Dey<sup>1,5</sup>, Katrien Van Bocxlaer<sup>1</sup>, Helen Ashwin<sup>1</sup>,  
5 Najmeeyah Brown<sup>1</sup>, Elmarie Myburgh<sup>1</sup>, Nidhi S Dey<sup>1</sup>, Gulab Fatima Rani<sup>1,7</sup>, Edward  
6 Muscutt<sup>1</sup>, Mohamed Osman<sup>1</sup>, Damian Perez-Mazliah<sup>1</sup>, Sally James<sup>2</sup>, Lesley Gilbert<sup>2</sup>,  
7 Mitali Chatterjee<sup>3</sup> and Paul M Kaye<sup>1, 4\*</sup>

8

9

10

11 <sup>1</sup> York Biomedical Research Institute, Hull York Medical School, University of York,  
12 Heslington, YO10 5DD, York, UK

13 <sup>2</sup> Genomics Laboratory, Bioscience Technology Facility, University of York,  
14 Heslington, YO10 5DD, York, UK

15 <sup>3</sup> Dept. of Pharmacology, Institute of Postgraduate Medical Education & Research,  
16 Kolkata, 700 020, India

17 <sup>4</sup> Lead Contact

18 <sup>5</sup> These authors contributed equally

19 <sup>6</sup> Current address: Translational Research Institute, Woolloongabba, QLD, 4102,  
20 Australia

21 <sup>7</sup> Current address: Institute of Pathology and Diagnostic Medicine, Khyber Medical  
22 University, Peshawar, 25100, Pakistan

23

24 \*Correspondence: [paul.kaye@york.ac.uk](mailto:paul.kaye@york.ac.uk)

25 SUMMARY

26 Many parasites of significant public health importance assume skin residency without  
27 causing overt pathology. How immune and stromal cells respond to such “cryptic”  
28 infections and how exposure to UVB alters such responses is poorly understood.  
29 We combined scRNA-seq, spatial transcriptomics and inferential network analysis to  
30 address these questions in a model of cryptic skin infection by *Leishmania donovani*.  
31 In infected C57BL/6 mice, p-selectin and CXCL12 interactions dominate intercellular  
32 communication between leucocytes, fibroblast and endothelial cells, but effector T  
33 cell function remains muted. Following UVB exposure, increased numbers of IFN $\gamma$ <sup>+</sup>  
34 CD4<sup>+</sup> Th1 cells and NK cells enter the skin, communicating with stromal cells via  
35 CCL5-CCR5 and LFA-1-ICAM1/2. However, spatial mapping indicated that Th1 cells  
36 and macrophages occupied distinct niches after UVB exposure, likely limiting  
37 effector function. Our data provide the first holistic view of the immune landscape  
38 during cryptic *L. donovani* infection and demonstrate how UVB exposure  
39 fundamentally reshapes this response.

40

41

42 KEYWORDS

43 UVB, immune cells, stromal cells, skin, cryptic infection, landscape, leishmaniasis,  
44 scRNA-seq, spatial transcriptomics

45 GRAPHICAL ABSTRACT

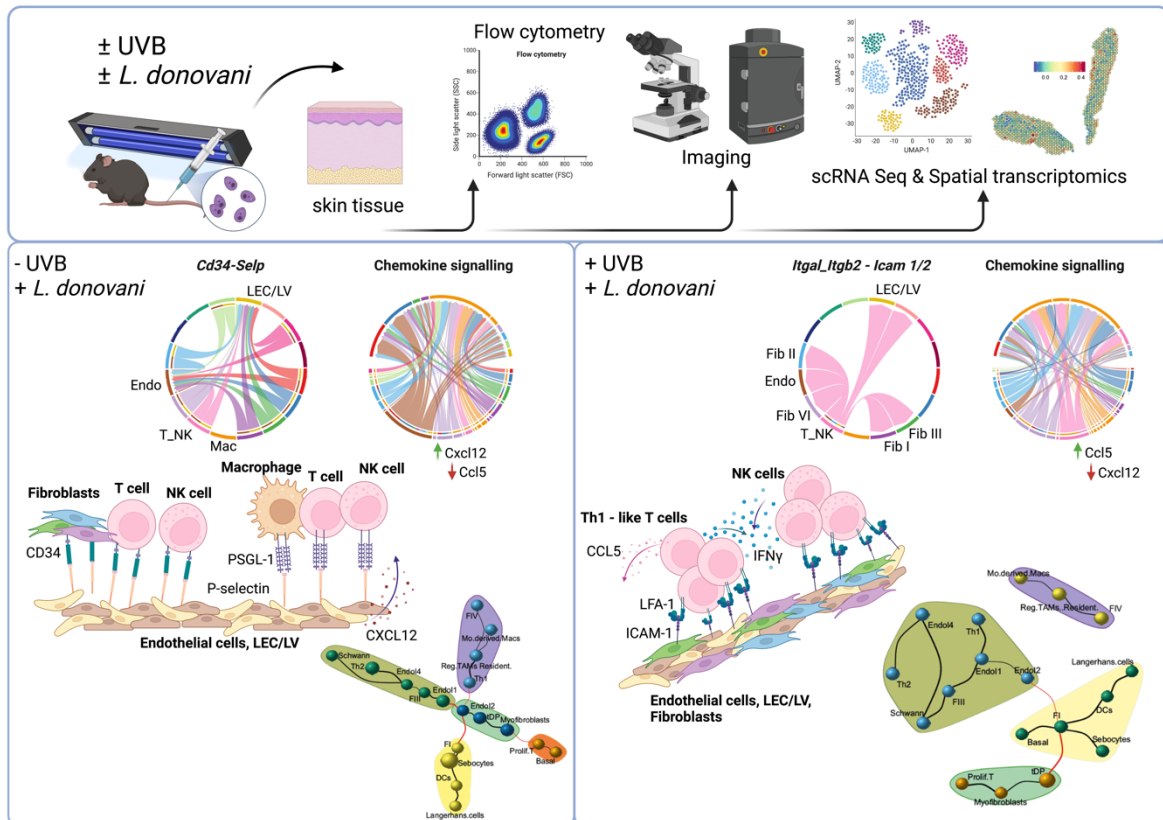

46

## 47 INTRODUCTION

48 Trypanosomatid parasites cause a range of globally important diseases, including  
49 leishmaniasis, African trypanosomiasis and Chagas disease, with significant  
50 consequences for health and economic prosperity. Whilst more notable for causing  
51 systemic disease, recent studies in mice and humans have highlighted the skin as  
52 an important site of parasitism by many trypanosomatids<sup>1-4</sup> including *Leishmania*  
53 *donovani* the causative agent of visceral leishmaniasis<sup>5-9</sup>. Such skin infections  
54 generally proceed in the absence of overt pathology yet may facilitate parasite  
55 transmission and provide a challenge for chemotherapy<sup>10</sup>. Few studies, however,  
56 have systematically addressed how the skin immune landscape is altered during  
57 such “cryptic” infections.

58  
59 The skin represents our major barrier to the outside world, reflected by its complex  
60 microanatomy. Below an epidermal barrier capable of extensive remodelling in  
61 response to traumatic injury and aging lies the dermis, a complex microenvironment  
62 comprised of stromal elements and immune cells that lends itself to interrogation by  
63 systems level approaches. These have been used successfully to decipher  
64 pathways of skin stromal cell development<sup>11,12</sup> and how wound healing across the  
65 life span is accompanied by an altered inflammatory milieu<sup>13</sup>. Alteration in skin  
66 landscape have similarly been studied in psoriasis and atopic dermatitis<sup>14</sup> and  
67 cancer<sup>15</sup>, promising to contribute to the development of new therapeutic approaches  
68 to target these and other skin disorders. Skin-microbiota interactions have received  
69 much attention, with implications for normal homeostasis, immune system health and  
70 the response to infection<sup>16,17</sup>. However, how the skin reacts to many common and  
71 extrinsic environmental stimuli remains poorly understood.

72  
73 Ultraviolet radiation (UVR) is important for normal physiology, melanogenesis and  
74 vitamin D production<sup>18</sup> and a potent environmental modifier of immune function  
75 [reviewed in<sup>18</sup>]. Representing ~9% of total UVR in sunlight<sup>19</sup>, UVB can suppress  
76 primary and anamnestic responses and result in antigen specific tolerance<sup>20</sup>. UVB  
77 exposure has therapeutic value in the treatment of psoriasis via modulation of  
78 autoinflammatory pathways<sup>21</sup>, has been shown to affect metabolic programming and  
79 senescence in keratinocytes<sup>22,23</sup>, can drive transcriptional changes associated with  
80 photo-aging<sup>24</sup> and can induce epigenetic changes during carcinogenesis<sup>25</sup>). In

81 models of cutaneous leishmaniasis (CL), UVB has varied effects depending on  
82 parasite species and/or level of UVB exposure<sup>26,27</sup>. UVB has also been implicated  
83 in the pathogenesis of post kala-azar dermal leishmaniasis (PKDL), an important  
84 skin sequela of VL<sup>5,28-30</sup>. However, the impact of UVB on cryptic skin infections with  
85 *Leishmania*, or indeed on any infection, has not been studied previously.

86

87 Here, we sought to define the how the immune and stromal cell landscape is  
88 remodelled during cryptic skin infection with *L. donovani* and how this remodelling is  
89 impacted by UVB exposure. Using single-cell RNA sequencing (scRNA-Seq),  
90 spatial transcriptomics and inferential network analysis, we identified key cellular and  
91 molecular changes associated with skin infection and demonstrate that effector  
92 lymphocytes and macrophages, key players in anti-leishmanial immunity and skin  
93 inflammation, occupy discrete cellular niches following UVB exposure. We conclude  
94 that UVB leads to a profound re-wiring of immune and stromal cell interaction  
95 networks during infection, on par with those reported to be induced by microbiota,  
96 and that this may facilitate cryptic infection.

97

98

## 99 RESULTS

### 100 ***Development of a UVB exposure model in C57BL/6J mice***

101 To avoid acute skin damage, we established a low-dose UVB irradiation model in  
102 female C57BL/6J mice, wherein flank skin was pre-conditioned with UVB 500J/m<sup>2</sup>  
103 three times a week for three weeks<sup>31,32</sup> prior to infection and subsequently  
104 throughout early infection. Dermatological, parasitological and immunological  
105 endpoints were determined at day 16 post infection (p.i.), by quantitative  
106 spectrometry, *in vivo* bioluminescence imaging, histology, flow cytometry and single  
107 cell and spatial transcriptomics (**Fig. 1a** and Methods).

108

109 Mice exposed to UVB (+UVB mice) exhibited minimal changes in melanin (**Fig. 1b**  
110 **and c, and Supplementary Fig. 1a**), minimal erythema<sup>33</sup> and only mild epidermal  
111 thickening (**Fig. 1f and Supplementary Fig. 1a,b**) compared to non-exposed mice (-  
112 UVB mice), irrespective of infection status. Parasites were detectable in the skin and  
113 viscera of infected but not uninfected mice, with splenomegaly also evident  
114 (**Supplementary Fig. 1c-h**). As previously reported in B6.*Rag2*<sup>-/-</sup> mice<sup>5</sup>, parasites

115 in the skin of immunocompetent C57BL/6 showed a patchy distribution and no  
116 significant differences were observed due to UVB exposure (**Fig. 1g and h**).  
117 Collectively, these data indicate that i) UVB exposure and / or skin parasitism do not  
118 lead to clinically significant pathology and ii) that the UVB regimen employed does  
119 not directly impact levels of skin parasitism.

120

### 121 ***UVB selectively alters skin cell composition during *L. donovani* infection***

122 We used multi-parameter flow cytometry to generate a high-resolution phenotypic  
123 map of immune and stromal cells in uninfected and infected -UVB and +UVB mice  
124 (**Fig. 2a and b and Supplementary Fig. 2a-c**). In uninfected mice, UVB exposure  
125 significantly increased the frequency of CD45<sup>-</sup>Ter119<sup>-</sup>CD31<sup>-</sup>PDPN<sup>+</sup> stromal cells but  
126 decreased the frequency of CD45<sup>-</sup>Ter119<sup>-</sup>CD29<sup>+</sup> endothelial cells and CD45<sup>-</sup>Ter119<sup>-</sup>  
127 CD4<sup>-</sup>CD49f<sup>hi</sup>CD34<sup>+</sup> hair follicle stem cells (HFSCs). *L. donovani* infection similarly  
128 increased the frequency and number of CD45<sup>-</sup>Ter119<sup>-</sup>CD31<sup>-</sup>PDPN<sup>+</sup> stromal cells  
129 compared to uninfected mice, often to a greater extent, but this was dampened by  
130 UVB exposure. Furthermore, *L. donovani* infection reduced the frequency and  
131 number of endothelial cells and HFSCs, with both effects exacerbated in +UVB mice  
132 (**Fig. 2b and Supplementary Fig. 2d**). No other significant differences were  
133 observed across the remaining stromal cell populations analysed. Amongst immune  
134 cells, we noted reductions in frequencies and numbers of CD11b<sup>+</sup>Ly6C<sup>int</sup> and  
135 CD11b<sup>+</sup>Ly6C<sup>hi</sup> monocytes in infected +UVB mice compared to infected -UVB mice  
136 (**Fig. 2c and d and Supplementary Fig. 2d**). No other significant differences were  
137 evident across the remaining immune cell populations analysed, although there was  
138 a trend towards an increase in T cells and NK cells following infection. Hence, at this  
139 level of phenotypic analysis, UVB exposure induces changes in stromal and immune  
140 populations that were either mimicked or exaggerated by infection. Superimposing  
141 UVB and infection resulted in additional changes, indicative of a complex interplay  
142 between these two skin insults.

143

### 144 ***scRNA-Seq analysis of the skin cellular landscape during *L. donovani**** 145 ***infection***

146 To characterise changes in the skin microenvironment more fully, we generated an  
147 integrated scRNA-Seq cell atlas from 34,705 cells across all conditions. Using  
148 consensus markers<sup>34,35</sup>, we identified 16 cell clusters based on cluster-specific gene

149 expression (**Fig. 3a, Supplementary Fig. 3, Supplementary Table 1**). We mapped  
150 the spatial distribution of these clusters in healthy non-UVB exposed skin using the  
151 10X Visium platform (**Fig. 3b and c**). Fibroblasts FI and FII represented papillary  
152 fibroblasts with a sub-epidermal location. Fibroblasts FIII – FVI were largely  
153 restricted to the reticular dermis, muscle and adipose tissues, though FV and FVI  
154 also localised to occasional dermal areas populated by macrophages, T cells and  
155 NK cells. Macrophages were prominent in the dermis as well as adipose tissue  
156 (**Fig. 3c**). We then performed pairwise comparisons across experimental groups to  
157 generate ‘response-specific’ transcriptional signatures from the scRNA-seq data.  
158

### 159 *L. donovani* infection induces local transcriptional changes

160 We first compared *L. donovani* infected and uninfected -UVB mice, providing an  
161 unprecedented view of the local response to cryptic infection in the conventional  
162 mouse model (**Fig. 4a-c and Supplementary Fig. 4a and b**). Infected skin had a  
163 greater proportion of FV (*Ptx3, Ccl2, Cxcl1*) and FVI (*Cxcl9, Cxcl1, Gpb2*) fibroblasts  
164 and basal cells / keratinocytes (*Sfn, Krt14, Krt17*) compared to uninfected skin (**Fig.**  
165 **4a**). Conversely, infected skin had a reduced frequency of FI fibroblasts and  
166 endothelial cells (*Fabp4, Cd36, Aqp1*) when compared to uninfected skin. Differential  
167 gene expression (DGE) analysis identified major changes to gene expression in  
168 each cell population (**Supplementary Fig. 4b**). *Ccl2* was most highly upregulated in  
169 T\_NK cells, endothelial cells, fibroblast populations FI, FIII, FIV and Schwann cells  
170 (**Fig. 4b**), highlighting a potential role for chemokine-mediated cellular recruitment  
171 during infection. Importantly *Cxcl1*, involved in inflammasome activation<sup>36</sup> was the  
172 most significantly upregulated gene in the macrophage cluster (*Retnla, Lyz2, Ccl6,*  
173 *Fcer1g*) and in fibroblasts. *Cxcl2* and *Ccl2* were also both highly upregulated in  
174 fibroblast populations FII, FIII, FIV, FV along with lymphatic endothelial cells  
175 (LEC\_LV; **Fig. 4b and Supplementary Fig. 4b**). Gene set enrichment analysis<sup>37</sup> of  
176 the top 25 upregulated genes in FV fibroblasts, basal cells, macrophages and T\_NK  
177 cells indicated an upregulation of IFN $\gamma$  response genes in FV fibroblasts and  
178 macrophages (**Fig. 4c**). Genes involved in TNF signalling via NF- $\kappa$ B were  
179 upregulated in FV fibroblasts, macrophages and T\_NK cells. Genes upregulated in  
180 basal cells were enriched for the p53 pathway (likely associated with stress  
181 responses), and pathways associated with coagulation and IL2-STAT5 signalling.

182 In addition to *Ccl2* and *Cxcl1*, *Gsn* (gelsolin; an actin-binding protein associated with  
183 apoptosis and invasion), *Dcn* (decorin; an extracellular matrix protein secreted by T  
184 cells that can inhibit chemokine signalling<sup>38</sup>) and *Mt1* (metallothionein 1; involved in  
185 T cell differentiation<sup>39</sup>) were upregulated in T\_NK cells. *Ptx3*, previously identified as  
186 a regulator of CD4<sup>+</sup> T cell responses in CL<sup>40</sup> was upregulated in FII and FV  
187 fibroblasts as well as other populations (**Supplementary Fig. 4b**). Collectively, these  
188 data provide the first overview of the changing immune landscape associated with  
189 cryptic *L. donovani* skin infection.

190

191 *UVB exposure reduces CXC-ligand expression and drives metabolic re-*  
192 *programming in immune and stromal cells*

193 Next, we identified changes solely attributable to UVB under these exposure  
194 conditions, comparing uninfected +UVB and -UVB mice (**Fig. 4d-j**). Reduced  
195 proportions of FI and FII fibroblasts, myofibroblasts and T\_NK cells were observed in  
196 +UVB mice compared to -UVB mice (**Fig. 4d**), with concomitant alterations in gene  
197 expression profile (**Fig. 4e** and **Supplementary Fig. 4c**). Notably, *Cxcl1* (FVI  
198 fibroblasts), *Cxcl2* (macrophages, FVI fibroblasts), *Cxcl13* (FIV fibroblast) were  
199 downregulated on UVB exposure. *Tm4sf1*, necessary for endothelial migration<sup>41</sup>  
200 was also down regulated in endothelial cells and basal cells, whereas in  
201 macrophages and fibroblasts (FIII, FIV and FV), *Ifi2712a*, a candidate anti-viral ISG  
202<sup>42</sup>, was down-regulated (**Fig. 4e**). Fibroblast populations FII – FVI show increases in  
203 *mt-Co3*, a mitochondrial cytochrome c oxidase gene that drives oxidative  
204 phosphorylation and has been reported to increase upon UVB exposure<sup>43</sup>.  
205 Furthermore, we noted reduced accumulation of *Rarres2*, *Cyp2f2* and *Angptl1* upon  
206 UVB exposure in FI fibroblasts (**Supplementary Fig. 4c**) supporting the hypothesis  
207 of metabolic reprogramming of fibroblasts in +UVB compared to -UVB mice, and  
208 consistent with a recent study of human fibroblasts exposed to UVB<sup>44</sup>.

209

210 GSEA analysis of upregulated genes in +UVB mice highlighted TNF signalling and  
211 hypoxia in FIV and FI fibroblasts (**Fig. 4f**) and Macrophages and T\_NK. Genes  
212 associated with UV response were enriched in FIV and FV fibroblasts and  
213 macrophages. To understand if UVB exposure induced a set of core genes in  
214 immune cells and fibroblasts, we looked at the intersection of the top 25 upregulated  
215 genes in macrophages and T\_NK cells (**Fig. 4g**) and in fibroblasts (**Fig. 4h**). We



216 found that 43% of upregulated genes were common to both macrophages and T\_NK  
217 cells and related to oxidative phosphorylation and cAMP (cyclic AMP) stimulus (**Fig.**  
218 **4i**). Genes exclusively upregulated in macrophages were enriched for NADH  
219 dehydrogenase activity and protein folding. Conversely, uniquely regulated T\_NK  
220 cell genes were enriched for extracellular matrix constituents (**Supplementary Fig.**  
221 **4d**). Among fibroblast populations, genes upregulated upon UVB exposure also  
222 overlapped (**Fig. 4h**), with common genes enriched for electron transport chain (**Fig.**  
223 **4j**). FI fibroblasts had ten distinct genes enriched for MHC class I presentation  
224 (**Supplementary Fig. 4d**).

225

#### 226 *UVB exposure modifies the skin response to L. donovani infection*

227 Having established the baseline effects of UVB exposure, we next sought to  
228 examine how infection-associated gene expression patterns differed following UVB  
229 exposure (**Fig. 5**). Consistent with flow cytometric analysis (**Fig. 2**), we found an  
230 increase in the proportion of T\_NK cells in the skin of infected +UVB mice compared  
231 to uninfected +UVB mice (**Fig. 5a**). *Ccl5*, *Gzma* and *Ifng* were amongst the top  
232 upregulated genes in T\_NK cells in infected +UVB mice (**Fig. 5b** and  
233 **Supplementary Fig. 5a**). To further define these cells, we sub-clustered the T\_NK  
234 cluster to reveal 7 sub-clusters, defined as NK cells (*Nkg7*, *Gzma*), naïve T cells  
235 (*Il7r*), Th1-like (*Ifng*, *Ccl5*) and Th2-like (*Il5*, *Gata3*) TCR $\alpha\beta$  T cells, TCR $\gamma\delta$  (gDT) T  
236 cells and proliferating T cells (*Mki67*, *Tubb5*), along with a small contaminating  
237 subset of mast cells (*Mcpt4*, *Cma1*) (**Fig. 5c-e** and **Supplementary Table 2**). *Ifng*  
238 transcripts were largely restricted to Th1-like CD4<sup>+</sup> cells and this sub-cluster was  
239 over-represented amongst T\_NK cells in skin of infected +UVB mice compared to  
240 uninfected +UVB mice, largely at the expense of naïve T cells, TCR $\gamma\delta$  T cells, and  
241 proliferating T cells (**Fig. 5e** and **Supplementary Table 2**).

242

243 Likewise, macrophages were sub-clustered to reveal Langerhans cells (*Cd207*,  
244 *Cts3*), neutrophils (*S100a9*, *S100a8*), monocyte-derived macrophages (*Cd14*),  
245 dendritic cells (*Cd209*), inflammatory monocytes (*Cd14*, *Lyz2*, *Plac8*, *Ly6c*),  
246 regulatory/resident macrophages (*Adgre1*, *Apoe*, *Mrc1*, *C1q*, *Retnla*), proliferating  
247 myeloid cells (*Mki67*) and a minor population of NK-like cells (**Fig. 5c and d** and  
248 **Supplementary Table 2**). The proportions of each population varied across

249 treatment group, with infected +UVB mice showing substantially raised neutrophils  
250 and monocytes compared to uninfected +UVB mice largely at the expense of  
251 monocyte-derived macrophages, DCs and Langerhans cells (**Fig. 5e** and  
252 **Supplementary Table 2**). A 2 log-fold increase in *Ccl8*<sup>+</sup> was observed in  
253 macrophages in infected +UVB mice compared to uninfected +UVB mice (**Fig. 5b**  
254 and **Supplementary Fig. 5a**) associated largely with *Apoe*<sup>+</sup>*Mrc1*<sup>+</sup> *C1qb*<sup>+</sup> cells, a  
255 phenotype reminiscent of murine lipid-associated tumour-associated macrophages  
256 (LA-TAMs) / immune regulatory (Reg-) TAMs <sup>45</sup>. Based on higher abundance of  
257 *Adgre1* mRNA, these cells may also be resident macrophages of fetal origin <sup>46</sup>.

258

259 Multiple cell populations showed an increase in MHCII genes, this being most notable  
260 in fibroblasts in infected +UVB mice (**Fig. 5b** and **Supplementary Fig 5c**).

261 Whereas mitochondrial cytochrome genes related to oxidative phosphorylation were  
262 upregulated in fibroblasts in uninfected +UVB mice compared to uninfected -UVB  
263 mice (**Fig. 4h and j**), many of these genes were downregulated when comparing  
264 infected +UVB mice to uninfected +UVB mice (**Supplementary Fig. 5**). This  
265 suggests that while UVB exposure increases steady state expression in fibroblasts,  
266 subsequent infection may downregulate such responses. For example,  
267 downregulation of *mt-Co3* is seen across most cell types (**Supplementary Fig. 5**).

268 The long non-coding RNA *Malat1*, that participates in UVB-induced photo-aging in  
269 fibroblasts <sup>47</sup>, was in the top 5 upregulated transcripts in multiple cell types when  
270 comparing infected +UVB mice and uninfected +UVB mice (**Supplementary Fig. 5**).  
271 Hence, concurrent cryptic infection can modulate effects associated with UVB  
272 exposure.

273

274 We next directly compared transcriptional responses in infected +UVB and -UVB  
275 mice to delineate the differences more clearly between immune status in these two  
276 models (**Fig. 5a, b and e** and **Supplementary Fig. 5c**). This analysis confirmed  
277 expansion of T cells and FIV fibroblasts and a reduction of FV fibroblasts in infected  
278 +UVB vs infected -UVB mice. GSEA of the top 25 upregulated genes highlighted  
279 predominantly pro-inflammatory pathways (**Supplementary Fig. 5e**) accompanied  
280 by enhanced *Ifng* expression by Th-1 like cells (**Fig. 5b**). Indeed, the ratio of Th1-like  
281 to Th2-like cells was ~5 fold higher in infected +UVB mice compared to infected -  
282 UVB mice (**Fig. 5f**). Within Th-1 like cells, the ratio of *Cd8a*<sup>+</sup> to *Cd4*<sup>+</sup> cells was 1:4

283 (Fig. 5g). Strikingly, the *Ccl8*<sup>+</sup> macrophage signature was retained in this  
284 comparison, confirming the increase in regulatory / resident macrophages (Fig. 5b).  
285 *Apod* was also increased in fibroblasts FIII and FVI (Supplementary Fig. 5a and d).  
286 Collectively, these direct comparisons indicate that under conditions of UVB  
287 exposure, the skin response to cryptic *L. donovani* infection is skewed towards the  
288 expression of pro-inflammatory gene pathways and effector T and NK cell potential.  
289  
290 *Cxcl9* and *Cxcl12*, associated with regulating inflammation, leucocyte recruitment  
291 and tertiary lymphoid structures (TLS) formation in chronic inflammation and cancer  
292 <sup>48</sup>, were upregulated in multiple cell populations (notably endothelial cells and FIII  
293 fibroblasts) in infected +UVB compared to uninfected +UVB mice (Supplementary  
294 Fig. 5b). Given their role in the formation of TLS <sup>48</sup> and skin inflammation <sup>49</sup> and our  
295 flow cytometry data indicating changes in the abundance of CD31-PDPN<sup>+</sup> stromal  
296 cells (Fig. 2), we further examined the heterogeneity of *Pdpr* expression across all  
297 groups. As anticipated, *Pdpr* transcripts were associated to a greater or lesser  
298 extent with all fibroblast populations, with somewhat heightened expression in FII,  
299 FV and FVI fibroblasts after infection. UVB exposure had a deleterious effect on  
300 *Pdpr* expression on FV fibroblasts and LEC\_LV's (Supplementary Fig. 6a).

301

### 302 *Modification of immune and stromal cell circuits following UVB exposure*

303 We used CellChat <sup>50</sup> to identify “secreted signalling” and “cell-to-cell contact”  
304 pathways that provide the framework for cross-talk between immune and stromal  
305 cells (Fig. 6, Supplementary Fig. 6b and c). Amongst the latter, we identified a  
306 prominent role for CD34 / p-selectin (*Cd34-Selp*) and P-selectin glycoprotein 1  
307 (SELPLG) / p-selectin (*Selp/g-Selp*) pathways in the skin of infected -UVB mice.  
308 However, these interactions were absent in infected +UVB mice (Fig. 6a). We then  
309 identified the top ligand-receptor pairs that contribute to signalling in infected +UVB  
310 and -UVB mice. *Cd34-Selp* interactions scored highest among the top 5 exclusive  
311 interactions in infected -UVB mice (Supplementary Fig. 6b). Except for basal cells,  
312 tDPs (telogen dermal papilla), myofibroblasts and sebocytes, all cells (including  
313 macrophages and T\_NK cells) signal to endothelial cells and LEC\_LVs via the *Cd34-*  
314 *Selp* axis (Fig. 6b). We confirmed *Selp* expression in endothelial cells and LEC\_LVs  
315 occurred only in infected -UVB mice (Fig. 6d). CellChat probabilities also indicated  
316 that *Selp/g-Selp* interactions occur between macrophages and T\_NK cells and

317 endothelial cells / LEC\_LV again only in infected -UVB mice (**Fig. 6a and b**). This  
318 likely reflects the loss of *Selp* mRNA in endothelial and LEC\_LV after UVB exposure  
319 (**Fig. 6d**). In contrast to the role of p-selectin in infected -UVB mice, the prominent  
320 cell-to-cell contact interactions in infected +UVB mice involved T\_NK cell signalling  
321 via *Itgal/Itgb2* (LFA1) - *Icam1* and *Itga /Itgb2* - *Icam2* to myofibroblasts, FII, FVI, FI,  
322 FIII fibroblasts, endothelial cells and LEC\_LVs (**Fig. 6a and c**).

323

324 To further explore these interactions, we identified 6 sub-clusters of endothelial cells  
325 (**Fig. 7a and Supplementary Fig. 7a and b**), with *Selp* largely restricted to  
326 endothelial subcluster 1, bearing a gene signature indicative of cytokine activation  
327 (E-selectin, GM-CSF, von Willibrand Factor, aquaporin-1) (**Fig. 7b**). *Selp* mRNA was  
328 also abundant in a subpopulation of LEC\_LVs (**Supplementary Fig. 7c-e**).

329 Interestingly, *Icam2* expression in the endothelial subclusters showed no cluster-  
330 specificity whereas *Icam1* was found to be expressed in subclusters 1 and 2 (**Fig.**  
331 **7a**). In LEC\_LVs, *Icam2* was broadly expressed, whereas *Icam1* was restricted to  
332 subcluster 0 (**Supplementary Fig. 7e**). *Itgal* and *Itgb2* transcripts that contribute to  
333 increased signalling in infected +UVB mice were identified in the Th1-like and NK  
334 sub-clusters of T\_NK population (**Fig.s 5d and 7d**). *Itgb2* expression was broadly  
335 expressed in macrophages whereas *Itgal* was upregulated in macrophage subcluster  
336 1/inflammatory monocytes (**Fig.s 5d and 7d**).

337

338 We next explored secreted signalling pathways (**Fig. 7e**) given our earlier  
339 observation that infection induces a diverse chemokine response (**Fig. 4b, and**  
340 **Supplementary Fig. 6**) and the results from ligand-receptor predictions (**Fig. 6a**).  
341 While *Cxcl12-Ackr3* interactions were prominent in both infected +UVB and -UVB  
342 mice (**Supplementary Fig. 6b**), endothelial-led CXCL12-ACKR3 interactions were  
343 predicted to be markedly reduced in infected +UVB mice. Notably, *Cxcl12* was the  
344 top marker gene for endothelial subcluster 0 (**Fig. 7a, 7c**) and the proportion of  
345 endothelial cells in this sub-cluster was reduced two-fold in infected +UVB mice  
346 compared to infected -UVB mice (**Supplementary Fig. 7b**). Of note, CCL2-CCR2  
347 interactions were not predicted in -UVB mice (**Fig. 7e, left**), despite the prominence  
348 of a *Ccl2* signature in the skin (**Fig. 4b**), suggesting receptor availability is limiting. In  
349 contrast, this ligand-receptor pathway was observed in infected +UVB mice,  
350 associated with the greater expression of *Ccr2* by cells in the macrophage cluster

351 (Fig. 7e, right). Finally, given the prominent recruitment of *Irfng*<sup>+</sup>*Ccl5*<sup>+</sup> Th1-like cells in  
352 infected +UVB mice and the finding that CC chemokine pathways also appeared  
353 differently affected by UVB exposure, we examined CXC- and CC- chemokine  
354 circuits. We found that T cells in infected +UVB mice communicated with  
355 macrophages through *Ccr5*, in addition to the usage of *Ccr1* seen in infected -UVB  
356 mice (Fig. 7e). Furthermore, the main pathways of chemokine interaction between  
357 stromal cells themselves and stromal cells and immune cells were significantly  
358 different in infected +UVB compared to -UVB mice (Supplementary Fig. 6b).  
359 Collectively, these data indicate that UVB precipitates a wholesale re-shaping of the  
360 inter-cellular networks established during cryptic *L. donovani* skin infection.

361  
362 Finally, to understand the spatial relationships between cell types identified in our  
363 scRNA-seq data, we used Cell2location<sup>51</sup> to assign cell type abundances to  
364 individual Visium spots (Supplementary Fig. 8 and Methods). In infected -UVB  
365 mice, examination of the correlation between cell abundances indicated the  
366 presence of specific cellular niches (Fig. 8a). We used these correlations as  
367 distances to build graphs and calculated minimum spanning tree-based clusters. In  
368 infected -UVB mice, Th1 cells were predicted to most closely associate with  
369 regulatory / resident macrophages and monocyte-derived macrophages and FIV  
370 fibroblasts (Fig. 8b), an associated also apparent when the cell type signatures were  
371 mapped back to the Visium data (Fig. 8c and Supplementary Fig. 8b and 9). FIII  
372 fibroblasts were most closely associated spatially with Endo1 endothelial cells, likely  
373 interacting via the CellChat-predicted *Cd34-Selp* pathway (Fig. 8b and Fig. 6b).  
374 Applying the same approach to infected +UVB mice, we found that Th1 cells were  
375 now predicted to be more closely associated with Endo1 and Endo2 endothelial cells  
376 and spatially separated from both regulatory/ resident macrophages and monocyte-  
377 derived macrophages (Fig. 8d-f and Supplementary Fig. 8b and 9). As only Th1  
378 cells (in the T\_NK population) express *Itgb2* (Fig.s 5d, 6d & 7d) and both Endo1 and  
379 Endo2 cells are *Icam1*<sup>hi</sup> (Fig. 7a), this analysis further corroborates our earlier  
380 CellChat predictions (Fig. 6c). Thus, UVB exposure remodels the cellular niches  
381 that contain key players associated with anti-leishmanial immunity and the regulation  
382 of inflammation.

383

384

385 DISCUSSION

386 The molecular and cellular characterisation of immune and stromal components of  
387 the mouse skin during homeostasis and repair has been reported in great detail  
388 <sup>34,35,50,52-57</sup>, but how these are modified during cryptic infection by trypanosomatid  
389 parasites and how such responses might be affected by UVB were previously  
390 unknown. Here, we generated a transcriptional atlas of skin immune and stromal  
391 populations at rest and after *L. donovani* infection, in the presence and absence of  
392 UVB exposure. UVB was found to profoundly alter networks of intercellular  
393 communication, associated with heightened T cell activation and proinflammatory  
394 cytokine production. Our data provide new insights into i) how the skin  
395 microenvironment is altered during cryptic infection with an important human  
396 pathogen and ii) extend our understanding of the impact of UVB as an environmental  
397 modifier of immunity.

398

399 In conventionally housed *L. donovani* infected C57BL/6J mice, skin infection follows  
400 a previously described “patchy” distribution (Doehl et al., 2017) without overt clinical  
401 pathology, leading to cryptic infection at this site. Nevertheless, we observed  
402 significant changes in skin stromal and immune compartments indicative of sub-  
403 clinical inflammatory processes when comparing infected vs uninfected mice.  
404 Cellular communication in infected mice was dominated by fibroblast – endothelial  
405 cell cross talk, mediated through p-selectin signalling and there was an influx of  
406 CD11b<sup>+</sup>Lyc6<sup>int</sup> and CD11b<sup>+</sup>Ly6C<sup>hi</sup> inflammatory monocytes. Given the concurrent  
407 changes in the bone marrow myelopoiesis driven by visceral *L. donovani* infection <sup>58</sup>,  
408 it is likely that these monocytes are direct emigrants from the bone marrow <sup>59</sup>.

409 PDPN<sup>+</sup> fibroblastic stromal cells also increased in number and frequency yet despite  
410 increased *Cxcl1*, *Cxcl2* and *Ccl2* expression (reminiscent of studies in wounded skin;  
411 <sup>35</sup>, we did not observe a change in skin T cell abundance. Skin T cells detected in  
412 infected mice also had limited effector function suggesting that in mice with  
413 concurrent systemic VL, the skin inflammatory response remains somewhat muted.

414

415 Stromal cell - endothelial cell interactions are key to the regulation of inflammation <sup>60</sup>  
416 and a common perivascular fibroblast sub-population expressing SPARC, COL3A1  
417 and POSTN and with pro-inflammatory potential has been identified across multiple  
418 human inflammatory diseases <sup>61</sup>. Such cells bear similarities to the FVI fibroblasts

419 described here and our data represent the first to describe pathways regulating  
420 fibroblast-endothelial cell communication in infected skin and to identify the extent of  
421 CD34-p-selectin interactions. Selectins have previously been shown to play roles in  
422 wound healing<sup>62-65</sup> and CD34 is a highly glycosylated transmembrane pan-selectin  
423 protein ligand expressed by multiple sub populations of fibroblasts in steady state  
424 skin<sup>34</sup>, in the tumour microenvironment<sup>66</sup> and during infection (this manuscript). In  
425 contrast to CD34, PSGL-1 is the main leucocyte-expressed ligand of p- and e-  
426 selectin<sup>67</sup> and we show here that this represents the main ligand in infected -UVB  
427 mice for p-selectin-mediated cross talk between T cells and macrophages and  
428 endothelial cells / LEC\_LV.

429  
430 Two features stand out from our comparative analysis of infected -UVB and +UVB  
431 mice. First, in contrast to the low effector capacity of T cells in infected -UVB mice,  
432 Th1-like effector capacity mediated by both CD4<sup>+</sup> T cells and NK cells was  
433 augmented in infected +UVB mice. Paralleling observations made in autoimmune  
434 inflammatory diseases<sup>61</sup>, we interpret these data to suggest that UVB, either alone  
435 or in combination with other changes associated with infection, leads to the  
436 development of pro-inflammatory stromal cells that promote effector function in skin-  
437 infiltrating T cells during *L. donovani* infection. Second, in contrast to infected -UVB  
438 mice, where selectins and CXCL12 play prominent roles, inter-cellular  
439 communication in infected +UVB mice shows dramatic shifts in chemokine-  
440 chemokine receptor bias and towards the use of integrin signalling pathways. These  
441 changes appear linked both to a UVB-associated down-regulation of *Selp*  
442 expression, loss of *Cxcl12*-expressing endothelial cells and an increased influx of  
443 effector CD4<sup>+</sup> Th1 T cells and NK cells. Spatial mapping of these cell populations  
444 demonstrates the existence of discrete cellular niches in the skin of infected -UVB  
445 and +UVB mice, significantly extending our previous analysis describing the  
446 “patchiness” of the skin immune landscape during infection<sup>5,68</sup>. Strikingly, under  
447 conditions of UVB exposure, we found that effector Th1 cells were located in  
448 separate cellular niches to those containing regulatory / resident macrophages and  
449 monocyte-derived macrophages. We have previously characterised skin parasite  
450 distribution in B6.*Rag2*<sup>-/-</sup> mice, identifying that ~50% of parasites reside within cells  
451 expressing CD206 (ManR) a marker of alternate activation and regulatory phenotype  
452<sup>68</sup>. Studies using *L. major* (Seidman) have also defined parasitism of resident /

453 regulatory macrophages as a key event in the establishment and maintenance of  
454 persistent infection<sup>69</sup>. In the current study, we were able to detect skin *L. donovani*  
455 parasites by PCR and bioluminescent imaging in immunocompetent C57BL/6 mice,  
456 but the limited numbers have made detailed analysis of host cell preferences  
457 challenging. Given the paucity of parasites detectable in skin and their patchy  
458 distribution, it is likely that some changes we have observed are influenced at least  
459 in part by the systemic immune response to infection (rather than the local response  
460 in isolation or by parasites *per se*). An analogous situation is observed in patients  
461 with systemic sclerosis, where skin *SELP* and *CCL2* transcript abundance strongly  
462 correlates with the severity of interstitial lung disease<sup>70</sup>. Nevertheless, we  
463 hypothesize that the spatial segregation between Th1 cells and regulatory / resident  
464 macrophages may explain why host resistance is not improved by UVB exposure,  
465 despite heightened effector T cell recruitment, a situation that would both favour  
466 parasite persistence and set the scene for immunopathology.

467

468 PKDL is an important skin complication that often follows treatment for VL<sup>71</sup> but  
469 understanding of PKDL pathogenesis and the development of new treatments has  
470 been hindered by the lack of a pre-clinical model. We and others have speculated  
471 based on the clinical pattern of disease development that UVB may play a role in  
472 PKDL pathogenesis<sup>5,28-30</sup>. Examining the role of UVB in this study was in part driven  
473 by a desire to develop a model of PKDL but the current study was not designed  
474 primarily for that purpose. Whilst UVB enhances the pro-inflammatory environment  
475 thought to also underpin PKDL pathogenesis<sup>72</sup>, clinical symptoms of PKDL did not  
476 occur in mice under these conditions of UVB exposure. Two future modifications are  
477 likely to be required. First, in humans PKDL usually emerges after recovery from the  
478 systemic immunosuppressive state generated by VL<sup>72</sup>. Although systemic  
479 immunosuppression during experimental VL is less pronounced than in human  
480 disease, it may nevertheless serve to limit skin inflammation. Inducing systemic  
481 parasite clearance through drug treatment would therefore appear an appropriate  
482 next step. Second, mouse and human keratinocytes may respond differently to UVB  
483<sup>73-75</sup>, requiring the use of genetically-manipulated mouse models to achieve more  
484 precise disease positioning.

485



486 Our study has some additional limitations. The UVB regimen adopted here balances  
487 a requirement for pre-conditioning with the avoidance of acute skin damage, the  
488 confounding effects of hair regrowth and the practicalities of animal husbandry and  
489 so is not fully reflective of natural UVB exposure in disease endemic countries. We  
490 used only female mice to avoid confounding skin inflammation that often results from  
491 male aggression and additional studies will be required to determine whether the  
492 differences we observe here are sex-dependent.

493

494 In conclusion, we have clearly demonstrated the impact of UVB as an environmental  
495 modifier of local immune responses during cryptic skin infection by *L. donovani*,  
496 altering networks of inter-cellular communication and generating spatially disparate  
497 niches within the skin immune-stromal cell landscape. In addition to providing an  
498 unparalleled view of the skin response to infection, our data more broadly highlight  
499 the importance of considering UVB exposure during the development of translational  
500 models for drug and vaccine development against cutaneous infections.

501

502

### 503 ACKNOWLEDGEMENTS

504 The authors would like to acknowledge their gratitude to Karen Hogg, Graeme Park,  
505 Sally James, Lesley Gilbert and Katherine Newling (University of York Biosciences  
506 Technology Facility) for support with flow cytometry and scRNA-seq analysis, staff in  
507 the University of York Biological Services Facility for animal husbandry and Bruce  
508 Branchini and colleagues (Department of Chemistry, Connecticut College) for the  
509 kind gift of the “red-shifted” luciferase gene. Generation of luciferase-expressing *L.*  
510 *donovani* was funded by the Wellcome Trust (104976/Z/14/Z to E.M. and Jeremy C.  
511 Mottram). Graphical abstract created with BioRender.com. This work was funded by  
512 Wellcome Trust Investigator Awards to PMK (WT104726, WT224290).

513

### 514 AUTHOR CONTRIBUTIONS

515 Conceptualisation, M.M.O, MC and P.M.K; Methodology, M.M.O and P.M.K; Formal  
516 Analysis, M.M.O and S.D; Investigation, M.M.O, S.D, K.V.B, H.A, N.B, E.M, N.S.D,  
517 G.F.R, E.M, S.J and L.G; Resources, P.M.K, H.A, N.B and D.P.M; Writing - Original  
518 Draft, M.M.O and S.D; Writing – Review and Editing, M.M.O, S.D, K.V.B, E.M, M.O

519 and P.M.K; Visualisation, M.M.O and S.D; Supervision, P.M.K; Project

520 Administration, M.M.O and P.M.K; Funding Acquisition, P.M.K

521

522 DECLARATION OF INTERESTS

523 The authors declare no competing interests

524

525 INCLUSION AND DIVERSITY

526 We support inclusive, diverse and equitable conduct of research.

527

## 528 Figures

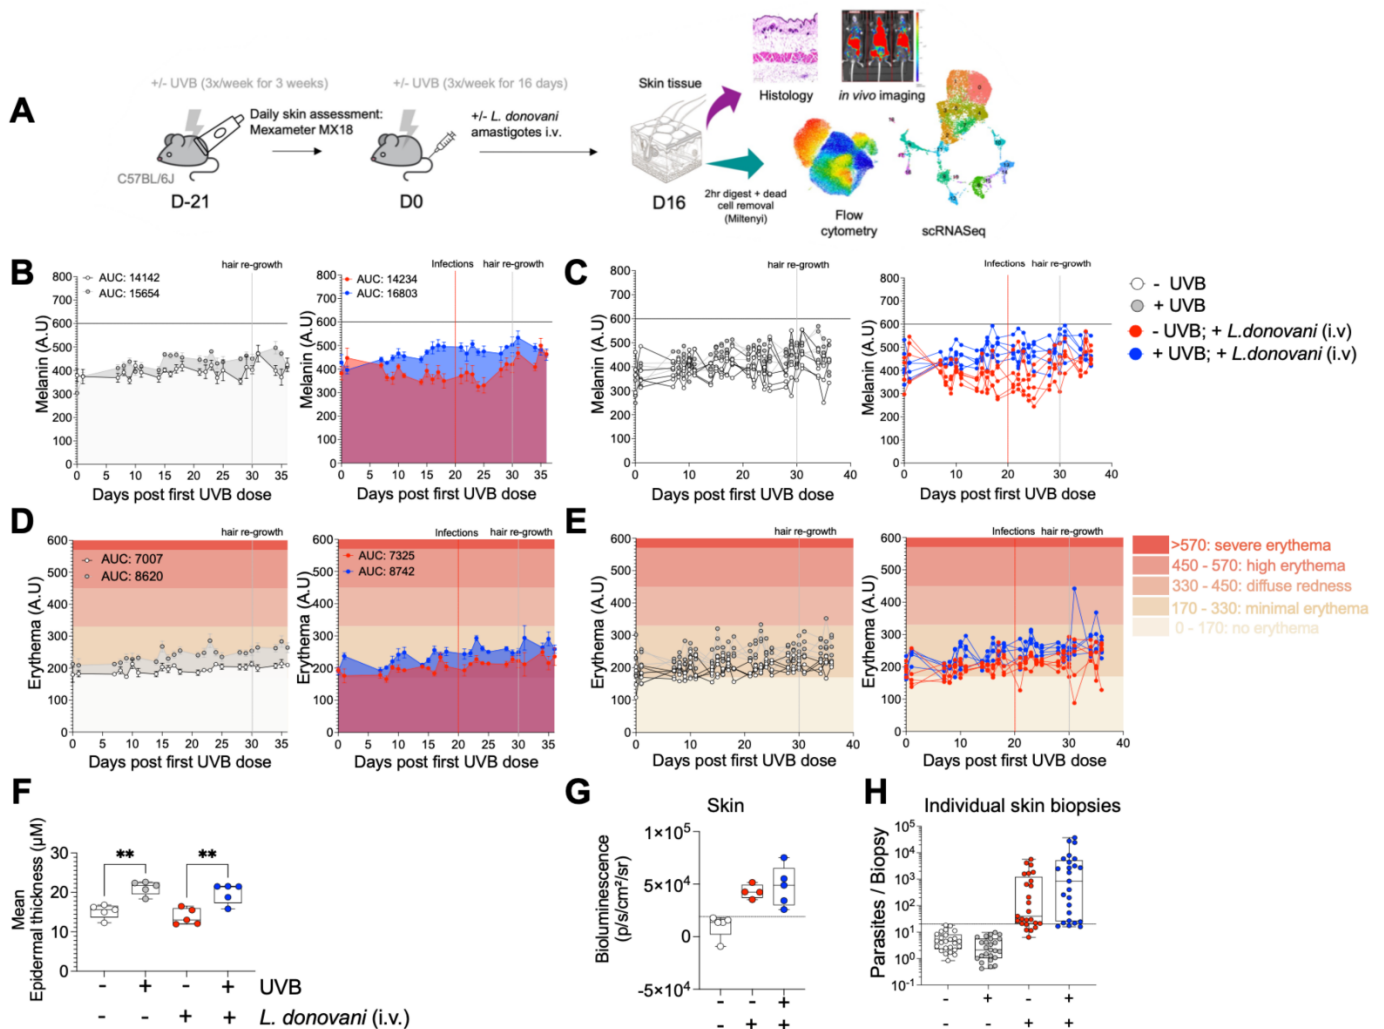

529

530

### 531 Fig. 1: UVB exposure model in control and *L. donovani*-infected C57BL/6J

532 mice

533 **A)** Schematic diagram detailing UVB exposure, infection and isolation of cells and

534 downstream analysis. **B)** Mean melanin measured in arbitrary units (A.U) for

535 uninfected -UVB and +UVB mice (left panel) and infected -UVB and +UVB mice

536 (right panel). Calculated Area Under the Curve (AUC) is also shown. Horizontal line

537 at 600 on y axis shows melanin values > 600 indicate dark skin; < 600 indicate light

538 skin. **C)** Mean melanin measured in each individual mouse in arbitrary units (A.U).

539 **D)** Mean erythema measured in A.U for uninfected -UVB and +UVB mice (left panel)

540 and infected -UVB and +UVB mice (right panel). AUC is also shown. **E)** Mean

541 erythema measured in each individual mouse in A.U. Symbols as in (D). Erythema

542 scale shown in graduated scale. **F)** Epidermal thickness measured in  $\mu\text{m}$  across

543 treatment groups. **G)** Skin bioluminescence imaging across treatment groups. **H)**

544 Parasite load per skin biopsy measured by qPCR. Box plots show the minimum, the

545 maximum, the sample median, and the first and third quartiles. Two-way ANOVA

546 with Tukey's multiple comparisons test or One-way ANOVA with Tukey's multiple

547 comparisons test, \*\*  $p < 0.01$ . Data shown are from two independent experiments

548 ( $n=5$  mice per experiment per group).

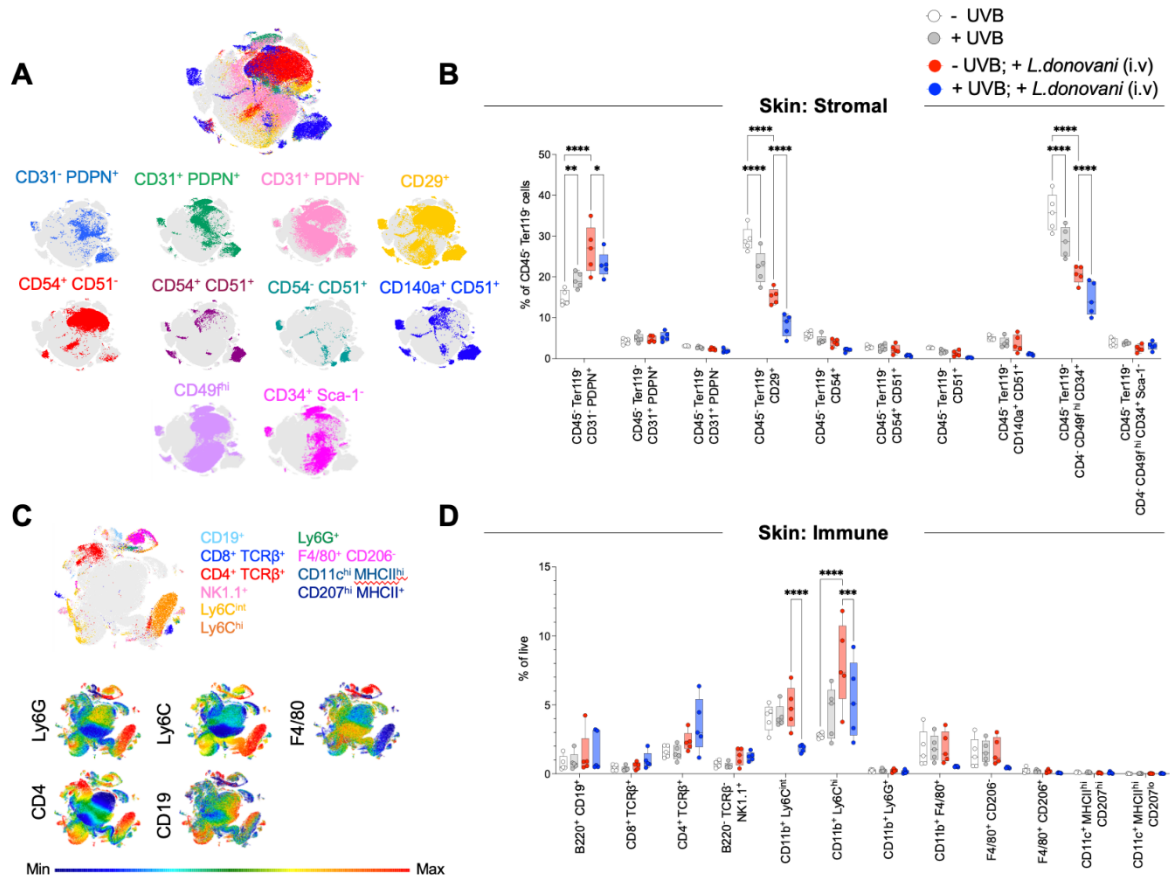

549

550 **Fig. 2: UVB modulates stromal and immune cell populations in the skin**

551 Skin tissue was processed for flow cytometric analysis as described in Methods. **A)**

552 UMAP plots showing individual stromal populations in the skin. **B)** Frequency of

553 stromal cell populations on day 16 p.i. **C)** UMAP plots showing immune cell

554 populations in the skin. **D)** Frequency of immune cell populations on day 16 p.i.. Box

555 plots show the minimum, the maximum, the sample median, and the first and third

556 quartiles. One-way ANOVA with Tukey's multiple comparisons test; \* p < 0.05, \*\* p <

557 0.01, \*\*\* p < 0.001, \*\*\*\*p < 0.0001. Data shown are representative of two

558 independent experiments (n=4-5 mice per experiment per group).

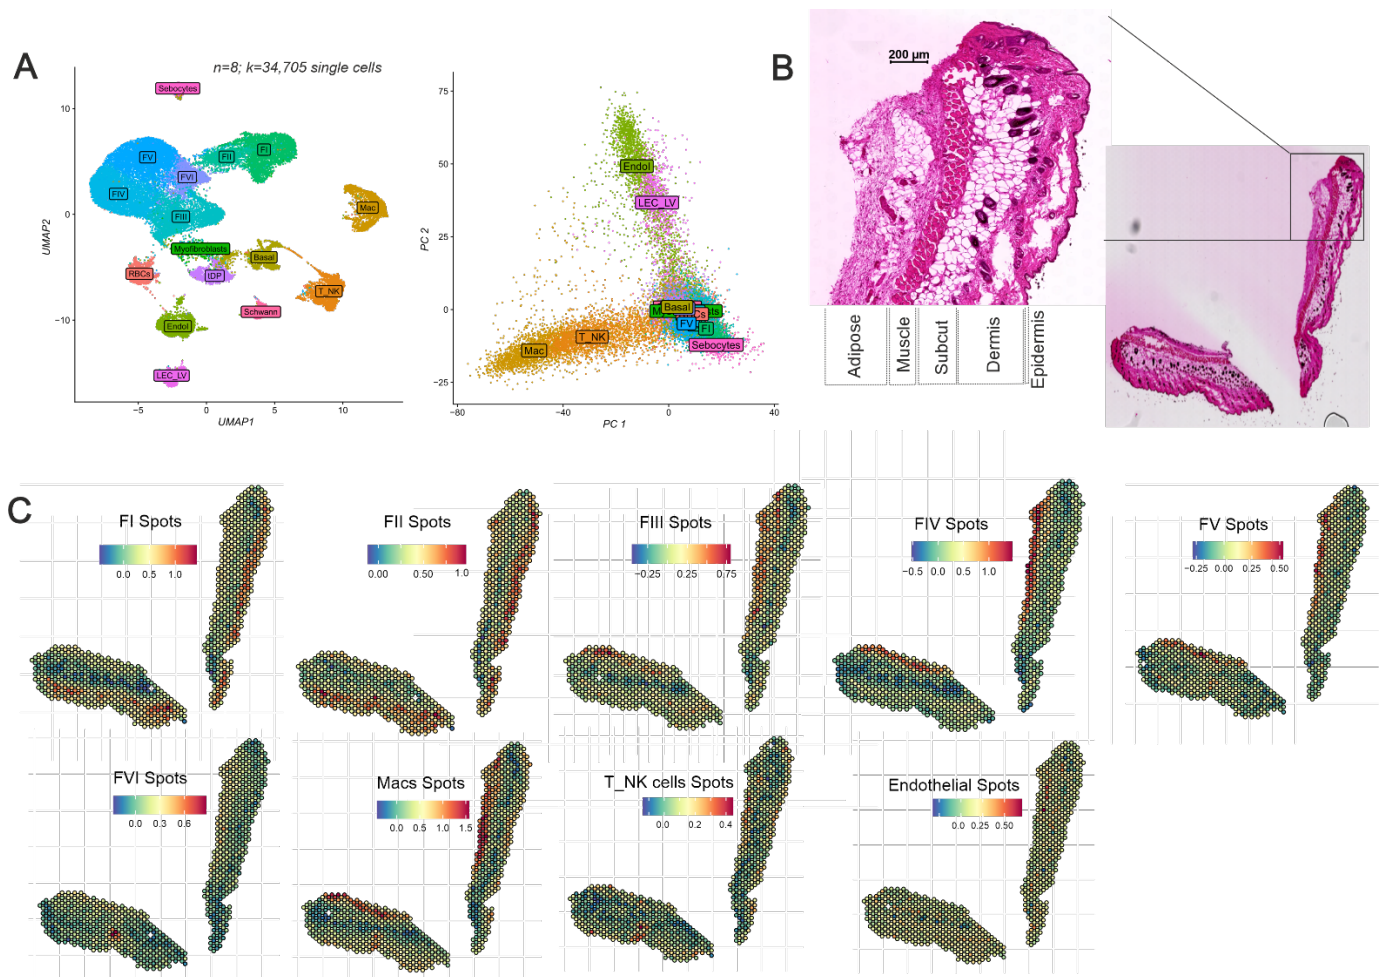

559

560

561

562 **Fig. 3: Single cell and spatial transcriptomic diversity of mouse skin**

563 Skin tissue was processed for scRNA-seq as described in Methods. **A)** Scatter plots  
564 showing cellular diversity in skin among all groups along with their imputed cell types  
565 (left) visualised using UMAP axes. Cell types visualised using the first two principal  
566 components (right). **B)** H&E-stained image of skin from -UVB mouse. **C)** Spatial plots  
567 showing position of enrichment of cell types (from A) in 55 µm Visium spots on -UVB  
568 mouse skin (from B). Data are derived from scRNA-seq analysis of 34,705 cells (k)  
569 from 8 mice (n).

570

571

572

573

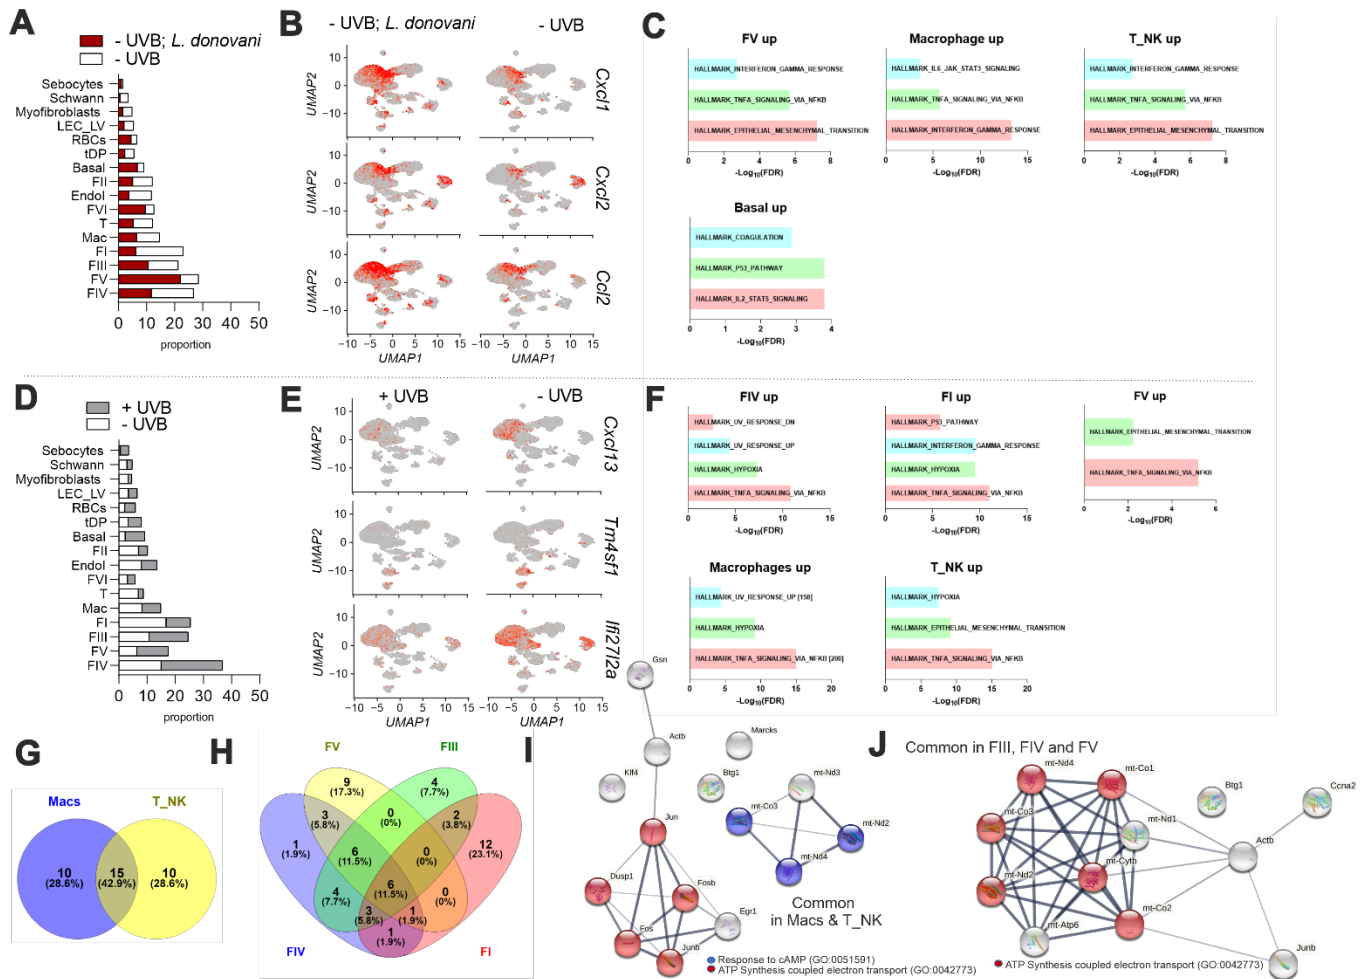

574

575

576 **Fig. 4: Gene expression changes associated with *L. donovani* infection and**

577 **UVB exposure**

578 **A)** Cell proportions in uninfected and infected -UVB mice. **B)** UMAP plots for infected

579 and uninfected -UVB mice showing expression of *Cxcl1*, *Cxcl2* and *Ccl2*. **C)** GSEA

580 enrichment (negative log FDR) for genes upregulated in fibroblast FV, macrophages,

581 T\_NK and Basal cells. **D)** Cell proportions in uninfected +UVB vs. -UVB mice. **E)**

582 UMAP plots for uninfected +UVB and -UVB mice showing expression of *Cxcl13*,

583 *Tm4sf1* and *Ifi272a*. **F)** GSEA enrichment for genes upregulated in fibroblasts FIV,

584 FI and FV, macrophages and T\_NK cells. **G)** Venn diagram to depict common genes

585 upregulated in macrophages and T cells of +UVB vs. -UVB mice. **H)** Same as G but

586 for fibroblasts **I)** STRING networks of commonly upregulated genes in macrophages

587 and T\_NK cells, coloured by gene ontology terms. **J)** STRING network of commonly

588 upregulated genes in FIII, FIV and FV. Data are derived from scRNA-seq analysis of

589 23,495 cells for A & B and 17,283 cells for D & E

590

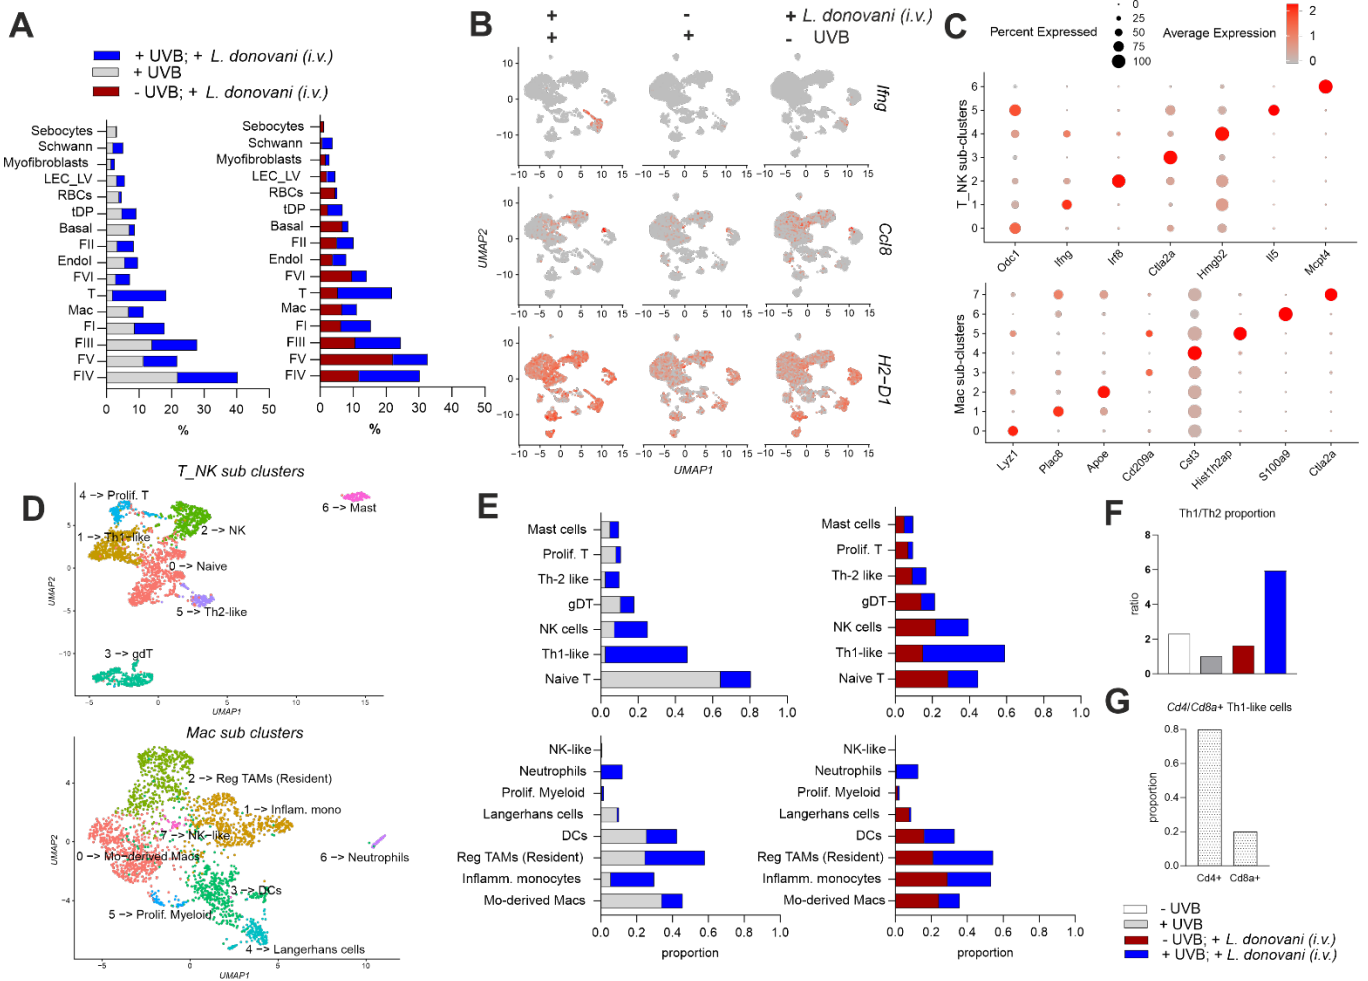

591

592 **Fig. 5: UVB pre-exposure affects immune populations differentially upon *L.***  
 593 ***donovani* infection**

594 **A)** Cell proportions shown for infected and uninfected +UVB mice (left) and infected  
 595 +UVB vs. -UVB mice (right). **B)** UMAP plots to show gene expression of *Ifng*, *Ccl2*,  
 596 *Ccl8*, *H2-D1* across comparisons shown in (A). **C)** UMAPs showing sub-clusters  
 597 within original T\_NK (above) and macrophage (below) clusters. **D)** Dot plots  
 598 showing the top genes expressed in T\_NK (above) and macrophage (below) sub-  
 599 clusters. Cluster numbers refer to populations shown in (C). **E)** Cell proportions of  
 600 imputed sub-clusters in (C) and (D), comparing infected and uninfected +UVB mice  
 601 (left) and infected +UVB vs. -UVB mice (right). **F)** Bar plot shows ratio of Th1-like  
 602 and Th2-like cells across all groups. **G)** Bar plot showing distribution of *Cd4*<sup>+</sup>  
 603 and *Cd8*<sup>+</sup> cells within the Th1-like population. Data are derived from scRNA-seq analysis  
 604 of 24,109 cells for A, B whereas sub-cluster analysis for T\_NK and Mac are based  
 605 on 2,274 and 2,362 cells respectively.

606

607

608

609

610

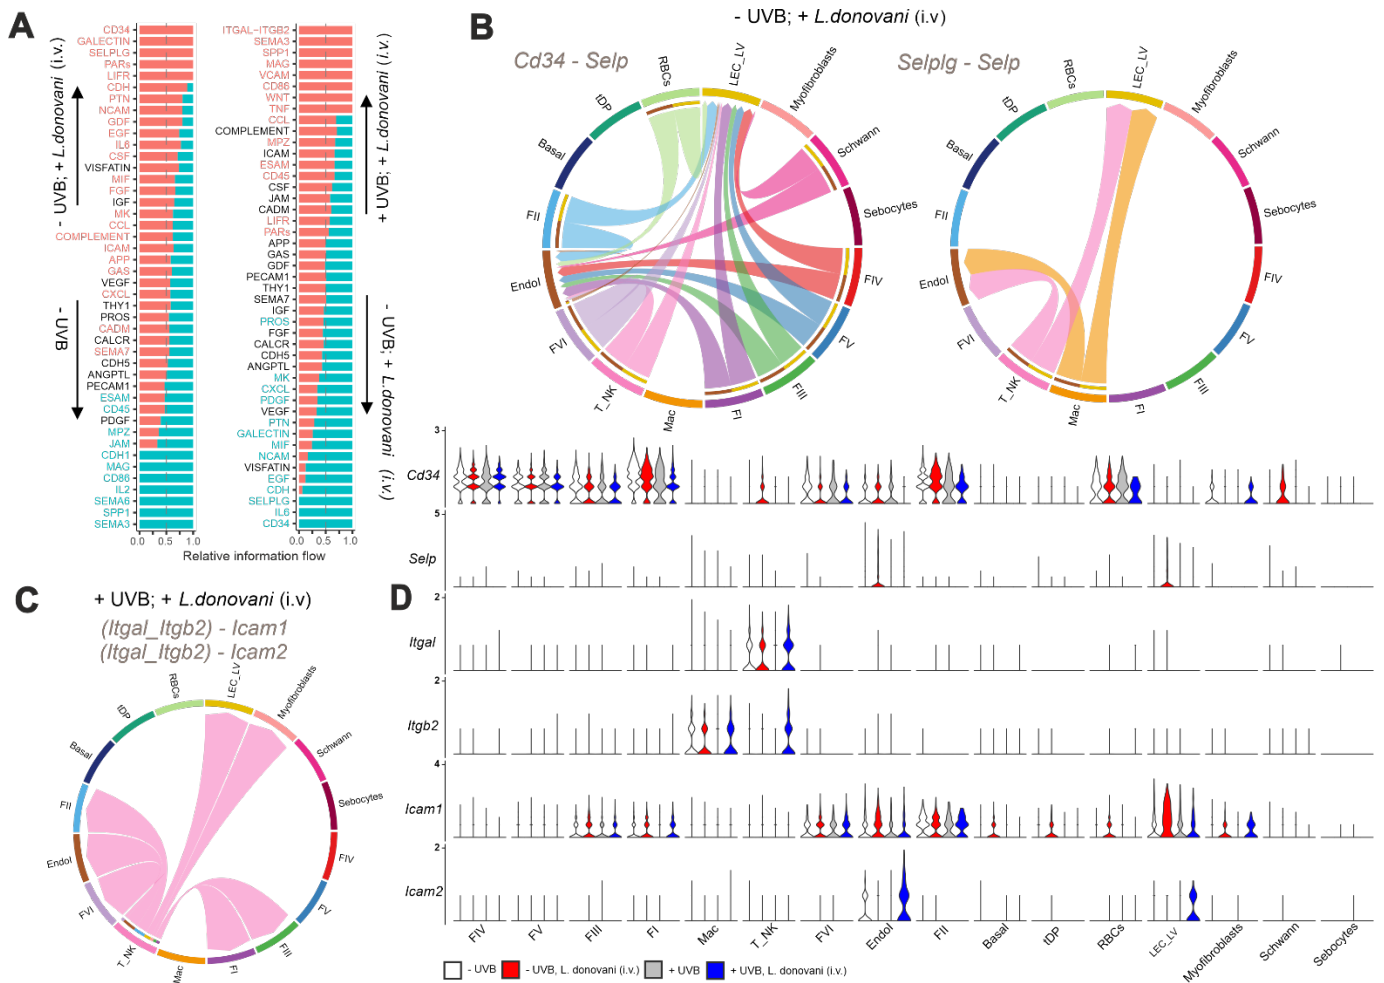

611

612

613 **Fig. 6: UVB exposure re-wires immune and stromal cell cross talk**

614 scRNA-seq data was analysed using CellChat as described in Methods. **A)** Pairwise  
 615 comparison of information flow between inferred signalling networks, with pathways  
 616 in red more enriched in groups indicated with upward arrow and vice versa. **B)** Chord  
 617 plots show directional flow of information (arrow heads indicate receiving  
 618 cells/receptors) between cell types for “*Cd34-Selp*” (left) and “*Selplg-Selp*” (right)  
 619 interactions in infected -UVB mice. **C)** Same as B, but for *(Itgal+Itgb2)-Icam1/2*  
 620 interactions in infected +UVB mice. **D)** Violin plots showing normalised gene  
 621 expression for each of the cell types split across comparison groups. Data are  
 622 derived from scRNA-seq analysis of 34,705 cells for A and D whereas B and C are  
 623 derived from 12,899 and 4,523 cells respectively.



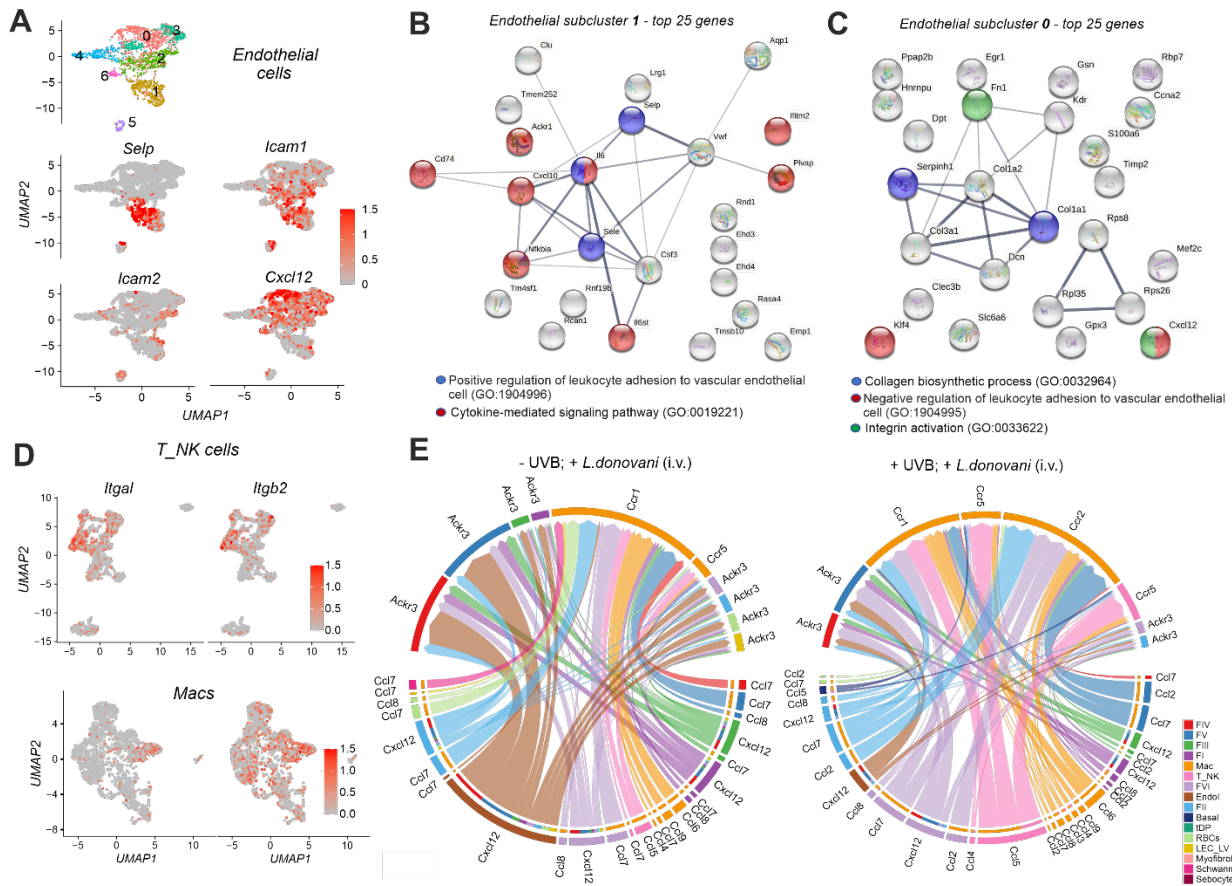

624

625 **Fig. 7: Expression and sub-cluster localisation for immune and stromal cell**  
 626 **signalling molecules**

627 **A)** Cluster memberships (colours) on sub-clustered endothelial cells along with *Selp*,  
 628 *Icam1*, *Icam2* and *Cxcl12* expression shown on UMAP. **B)** STRING networks of  
 629 commonly upregulated genes in endothelial subcluster 1 coloured by gene ontology  
 630 terms. **C)** Same as B but for endothelial subcluster 0. **D)** *Itgal* and *Itgb2* expression  
 631 shown on UMAP plot of T\_NK cells (above) and Macrophages (below). **E)** Chord  
 632 diagram representing *Ccl*- and *Cxcl*- mediated networks in infected -UVB vs. infected  
 633 +UVB mice. Colours indicate individual cell type and are indicated in the legend.  
 634 Data for A) and D) are derived from scRNA-seq analysis of 1894 endothelial, 2274  
 635 T\_NK, 2362 Mac cells whereas for E data is derived from 12,899 and 4523 cells for  
 636 infected -UVB and infected +UVB respectively.

637

638

639

640

641

642

643

644

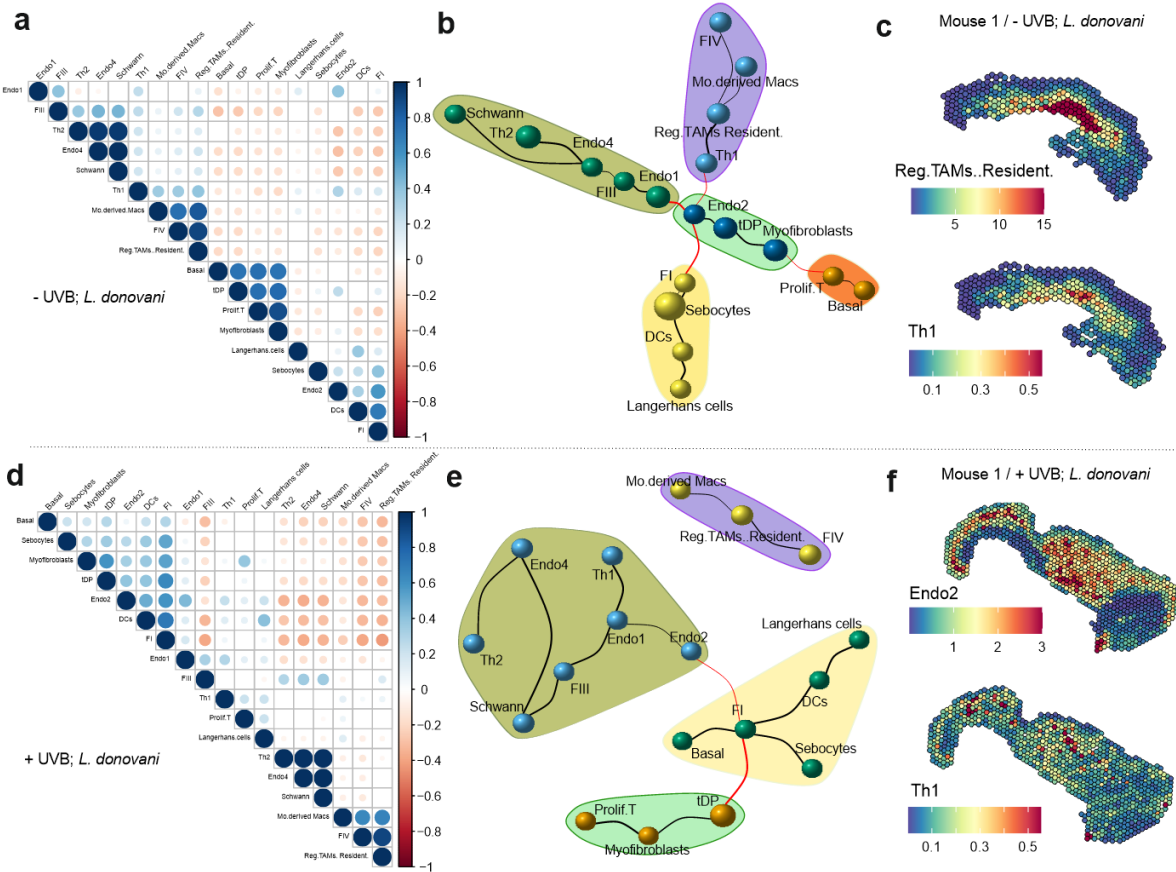

645

646

647

648 **Fig. 8: UVB and infection can modify cellular landscapes in skin**

649 **A)** Correlation plots of cell abundances calculated per spot using Cell2location for

650 infected -UVB mice. **B)** Clusters imputed after calculating minimum spanning tree of

651 graphs derived from connecting cells based on their pair-wise distance (1-

652 correlation). Black and red lines indicate connections within and between clusters

653 and the thickness indicates distance. **C)** Spatial plot showing the location of

654 regulatory TAM / resident macrophages with Th1 cells for representative *L. donovani*

655 infected -UVB mouse. **D-E)** Same as A) and B) but for *L. donovani* infected +UVB

656 mouse. **F)** Same as C) but for Endo2 and Th1 cells in representative *L. donovani*

657 infected +UVB mouse. Calculations based on 2101 spots for -UVB and 2985 spots

658 for +UVB mice with each spot measuring 55 micron from (n=3 mice per group).

659 Spatial images for additional mice are shown in Supplementary Fig. 8 and 9.

660

661

662

663

664

665

666

667 MATERIALS AND METHODS

668

669 KEY RESOURCES TABLE

| REAGENT or RESOURCE                                                                        | SOURCE                   | IDENTIFIER                           |
|--------------------------------------------------------------------------------------------|--------------------------|--------------------------------------|
| Antibodies                                                                                 |                          |                                      |
| Purified anti-mouse CD16/32 Antibody                                                       | BioLegend                | Cat# 101302,<br>RRID:AB_312801       |
| PromoFluor 840                                                                             | PromoCell                | PK-PF840-3-01                        |
| PerCP/Cyanine5.5 anti-mouse CD197 (CCR7) Antibody (clone: 4B12)                            | BioLegend                | Cat# 120116,<br>RRID:AB_2291144      |
| Brilliant Violet 605™ anti-mouse CD196 (CCR6) Antibody (clone: 29-2L17)                    | BioLegend                | Cat# 129819,<br>RRID:AB_2562513      |
| BUV395 Rat Anti-Mouse CD4 (clone GK1.5)                                                    | BD Biosciences           | Cat# 563790,<br>RRID:AB_2738426      |
| PE/Cyanine5 anti-mouse TCR β chain Antibody (clone: H57-597)                               | BioLegend                | Cat# 109210,<br>RRID:AB_313433       |
| Brilliant Violet 785™ anti-mouse/human CD44 Antibody (clone: IM7)                          | BioLegend                | Cat# 103059,<br>RRID:AB_2571953      |
| FITC anti-mouse CD11a Antibody (clone: M17/4)                                              | BioLegend                | Cat# 101106,<br>RRID:AB_312779       |
| PE/Cyanine7 anti-human/mouse Cutaneous Lymphocyte Antigen (CLA) Antibody (clone: HECA-452) | BioLegend                | Cat# 321316,<br>RRID:AB_2565768      |
| Mouse CCR10 PE-conjugated Antibody (clone: 248918)                                         | R&D Systems              | Cat# FAB2815P,<br>RRID:AB_2074259    |
| Brilliant Violet 421™ anti-mouse CD194 (CCR4) Antibody (clone: 2G12)                       | BioLegend                | Cat# 131218,<br>RRID:AB_2650890      |
| PE/Dazzle™ 594 anti-mouse CD49d Antibody (clone: R1-2)                                     | BioLegend                | Cat# 103626,<br>RRID:AB_2734161      |
| PE/Cyanine7 anti-mouse CD69 Antibody (clone: H1.2F3)                                       | BioLegend                | Cat# 104512,<br>RRID:AB_493564       |
| Brilliant Violet 510™ anti-mouse CD103 Antibody (clone: 2E7)                               | BioLegend                | Cat# 121423,<br>RRID:AB_2562713      |
| PE anti-mouse CD49a Antibody (clone: HMα1)                                                 | BioLegend                | Cat# 142604,<br>RRID:AB_10945158     |
| APC/Cyanine7 anti-mouse/human KLRG1 (MAFA) Antibody (clone: 2F1/KLRG1)                     | BioLegend                | Cat# 138426,<br>RRID:AB_2566554      |
| Brilliant Violet 421™ anti-mouse CD183 (CXCR3) Antibody (clone: CXCR3-173)                 | BioLegend                | Cat# 126522,<br>RRID:AB_2562205      |
| FITC anti-mouse Ly-6C Antibody (clone: HK1.4)                                              | BioLegend                | Cat# 128006,<br>RRID:AB_1186135      |
| PerCP/Cyanine5.5 anti-mouse Ly-6G Antibody (clone: 1A8)                                    | BioLegend                | Cat# 127616,<br>RRID:AB_1877271      |
| PE anti-mouse CD326 (Ep-CAM) Antibody (clone: G8.8)                                        | BioLegend                | Cat# 118206,<br>RRID:AB_1134172      |
| PE/Dazzle™ 594 anti-mouse I-A/I-E Antibody (clone: M5/114.15.2)                            | BioLegend                | Cat# 107648,<br>RRID:AB_2565979      |
| PE/Cyanine5 anti-mouse/human CD45R/B220 Antibody (clone: RA3-6B2)                          | BioLegend                | Cat# 103210,<br>RRID:AB_312995       |
| Biotin Rat anti mouse CD206 Antibody (clone: MR5D3)                                        | Bio-rad                  | Cat# MCA2235B,<br>RRID:AB_323868     |
| Streptavidin Pe-Cy7 Antibody                                                               | Thermo Fisher Scientific | Cat# 25-4317-82,<br>RRID:AB_10116480 |
| eFluor660 anti mouse CD207 (Langerin) (clone: eBioRMUL.2)                                  | eBioscience              | Cat# 50-2073-82,<br>RRID:AB_11218288 |

|                                                                        |                      |                                      |
|------------------------------------------------------------------------|----------------------|--------------------------------------|
| Alexa Fluor® 700 anti-mouse F4/80 Antibody (clone: BM8)                | BioLegend            | Cat# 123130,<br>RRID:AB_2293450      |
| APC/Cyanine7 anti-mouse CD8a Antibody (clone: 53-6.7)                  | BioLegend            | Cat# 100714,<br>RRID:AB_312753       |
| Brilliant Violet 421™ anti-mouse NK-1.1 Antibody (clone: PK36)         | eBioscience          | Cat# 108732,<br>RRID:AB_2562218      |
| Brilliant Violet 510™ anti-mouse/human CD11b Antibody (clone: M1/70)   | BioLegend            | Cat# 101263,<br>RRID:AB_2629529      |
| Brilliant Violet 605™ anti-mouse CD19 Antibody (clone: 6D5)            | BioLegend            | Cat# 115540,<br>RRID:AB_2563067      |
| Brilliant Violet 650™ anti-mouse TCR β chain Antibody (clone: H57-597) | BioLegend            | Cat# 109251,<br>RRID:AB_2810348      |
| Brilliant Violet 785™ anti-mouse CD11c Antibody (clone: N418)          | BioLegend            | Cat# 117336,<br>RRID:AB_2565268      |
| FITC anti-mouse CD45 Antibody (clone: 30-F11)                          | BioLegend            | Cat# 103108,<br>RRID:AB_312973       |
| FITC anti-mouse TER-119/Erythroid Cells Antibody (clone: TER-119)      | BioLegend            | Cat# 116206,<br>RRID:AB_313707       |
| BB700 anti-mouse CD106 Antibody (clone: 429 (MVCAM.A))                 | BD Biosciences       | Cat# 742108,<br>RRID:AB_2871381      |
| PE anti-mouse CD31 Antibody (clone: MEC13.3)                           | BioLegend            | Cat# 102508,<br>RRID:AB_312915       |
| PE/Dazzle™ 594 anti-mouse CD54 Antibody (clone: YN1/1.7.4)             | BioLegend            | Cat# 116130,<br>RRID:AB_2800583      |
| PE/Cyanine5 anti-mouse CD4 Antibody (clone: RM4-5)                     | BD Biosciences       | Cat# 553050,<br>RRID:AB_394586       |
| PE/Cyanine7 anti-mouse CD34 Antibody (clone: HM34)                     | BioLegend            | Cat# 128618,<br>RRID:AB_2721678      |
| APC anti-mouse CD140a Antibody (clone: APA5)                           | BioLegend            | Cat# 135908,<br>RRID:AB_2043970      |
| Alexa Fluor® 700 anti-mouse Ly-6A/E (Sca-1) Antibody (clone: D7)       | BioLegend            | Cat# 108142,<br>RRID:AB_2565959      |
| APC/Cyanine7 anti-mouse Podoplanin (gp38) Antibody (clone: 8.1.1)      | BioLegend            | Cat# 127418,<br>RRID:AB_2629804      |
| eFluor 450 anti-mouse CD49f (clone: eBioGoH3)                          | eBioscience          | Cat# 48-0495-82,<br>RRID:AB_11042564 |
| Brilliant Violet BV605™ anti-mouse CD29 Antibody (clone; HMβ1-1)       | BD Biosciences       | Cat# 740365,<br>RRID:AB_2740097      |
| Brilliant Violet BV650™ anti-mouse CD51 Antibody (clone: RMV-7)        | BD Biosciences       | Cat# 740546,<br>RRID:AB_2870640      |
| Brilliant Violet BV786™ anti-mouse CD102 Antibody (clone: 3C4(mIC2/4)) | BD Biosciences       | Cat# 740864,<br>RRID:AB_2740516      |
| BUV395 anti-mouse MAdCAM-1 Antibody (clone: MECA-367)                  | BD Biosciences       | Cat# 742818,<br>RRID:AB_2741070      |
| <b>Chemicals, peptides, and recombinant proteins</b>                   |                      |                                      |
| ACK Lysis Buffer                                                       | Lonza                | 10-548E                              |
| Collagenase type IV                                                    | Gibco                | 17104-019                            |
| Dnase I                                                                | PanReac<br>AppliChem | P120907; A3778-0050                  |
| Brefeldin A                                                            | Sigma-Aldrich        | B6542-5MG                            |
| PMA                                                                    | Sigma-Aldrich        | P8139-1MG                            |
| Ionomycin                                                              | Sigma-Aldrich        | I0634-1MG                            |
| UltraPure™ SSC, 20X; 1L                                                | ThermoFisher         | 15557044                             |
| DL-Dithiothreitol solution (DTT)                                       | Sigma-Aldrich        | 43816                                |
| Protector RNase Inhibitor                                              | Sigma-Aldrich        | 3335399001                           |
| RNALater                                                               | Sigma-Aldrich        | R0901-500ML                          |
| RPMI 1640                                                              | Gibco                | 11875085                             |

|                                                                  |                          |                                                                                                                                                                                                                           |
|------------------------------------------------------------------|--------------------------|---------------------------------------------------------------------------------------------------------------------------------------------------------------------------------------------------------------------------|
| dPBS                                                             | Gibco                    | 14190144                                                                                                                                                                                                                  |
| OCT                                                              | CellPath                 | KMA-0100-00A                                                                                                                                                                                                              |
| Critical commercial assays                                       |                          |                                                                                                                                                                                                                           |
| Chromium Next GEM Single Cell 3' Kit v3.1                        | 10x Genomics             | 1000269                                                                                                                                                                                                                   |
| Chromium Next GEM Chip G Single Cell Kit                         | 10x Genomics             | 1000127                                                                                                                                                                                                                   |
| Dual Index Kit TT Set A (for Gene Expression Libraries)          | 10x Genomics             | 1000215                                                                                                                                                                                                                   |
| Dead cell removal kit                                            | Miltenyi                 | 130-090-101                                                                                                                                                                                                               |
| MS columns                                                       | Miltenyi                 | 130-042-201                                                                                                                                                                                                               |
| DNeasy Blood & Tissue Kit                                        | Qiagen                   | 69504                                                                                                                                                                                                                     |
| Visium Spatial for FFPE Gene Expression Kit, Mouse Transcriptome | 10x Genomics             | 1000337                                                                                                                                                                                                                   |
| Dual Index Plate TS Set A                                        | 10x Genomics             | 1000251                                                                                                                                                                                                                   |
| Deposited data                                                   |                          |                                                                                                                                                                                                                           |
| Raw scRNA-seq data                                               | This paper               | GEO:                                                                                                                                                                                                                      |
| Raw spatial RNA-seq data                                         | This paper               | GEO:                                                                                                                                                                                                                      |
| Oligonucleotides                                                 |                          |                                                                                                                                                                                                                           |
| kDNAMini-F2: CTCCGGGTAGGGGCGTTC                                  | <sup>76</sup> ; Table 1  | N/A                                                                                                                                                                                                                       |
| kDNAMini-R2: GCCCTATTTTACACCAACCCC                               | <sup>76</sup> ; Table 1  | N/A                                                                                                                                                                                                                       |
| Software and algorithms                                          |                          |                                                                                                                                                                                                                           |
| Graphpad Prism v9                                                | Graphpad                 | <a href="https://www.graphpad.com/scientific-software/prism/">https://www.graphpad.com/scientific-software/prism/</a>                                                                                                     |
| FCS express v7                                                   | De novo Software         | <a href="https://denovosoftware.com/">https://denovosoftware.com/</a>                                                                                                                                                     |
| QuPath v0.2.3                                                    | <sup>77</sup>            | <a href="https://qupath.readthedocs.io/en/latest/index.html">https://qupath.readthedocs.io/en/latest/index.html</a>                                                                                                       |
| Zen Blue Image Analysis                                          | Zeiss                    | <a href="https://www.zeiss.com/microscopy/int/products/microscope-software/zen.html">https://www.zeiss.com/microscopy/int/products/microscope-software/zen.html</a>                                                       |
| Cell Ranger 6.0                                                  | 10x Genomics             | <a href="https://support.10xgenomics.com/single-cell-gene-expression/software/downloads/latest">https://support.10xgenomics.com/single-cell-gene-expression/software/downloads/latest</a>                                 |
| Space Ranger 1.3.0                                               | 10x Genomics             | <a href="https://support.10xgenomics.com/spatial-gene-expression/software/pipelines/latest/what-is-visium-ffpe">https://support.10xgenomics.com/spatial-gene-expression/software/pipelines/latest/what-is-visium-ffpe</a> |
| Seurat                                                           | Satija Lab <sup>78</sup> | <a href="https://satijalab.org/seurat">https://satijalab.org/seurat</a>                                                                                                                                                   |
| Venny                                                            | <sup>79</sup>            | <a href="https://bioinfogp.cnb.csic.es/tools/venny/index.html">https://bioinfogp.cnb.csic.es/tools/venny/index.html</a>                                                                                                   |
| CellChat                                                         | <sup>50</sup>            | <a href="http://www.cellchat.org/">http://www.cellchat.org/</a>                                                                                                                                                           |
| Cell2location                                                    | <sup>51</sup>            | <a href="https://github.com/BayraktarLab/cell2location/">https://github.com/BayraktarLab/cell2location/</a>                                                                                                               |
| R 4.1.1 (nickname: Kick Things)                                  | <sup>80</sup>            | <a href="https://www.r-project.org/">https://www.r-project.org/</a>                                                                                                                                                       |
| RStudio 2021.09.0 Build 351                                      | <sup>81</sup>            | <a href="http://www.rstudio.com/">http://www.rstudio.com/</a>                                                                                                                                                             |
| Loupe Browser 5                                                  | 10x Genomics             | <a href="#">Loupe Browser - 10x Genomics</a>                                                                                                                                                                              |
| STRING                                                           | <sup>82-84</sup>         | <a href="https://string-db.org/">https://string-db.org/</a>                                                                                                                                                               |

670

671

672 RESOURCE AVAILABILITY

673 *Lead Contact*

674 Further information, requests for resources and reagents should be directed to the  
675 lead contact, Paul M Kaye ([paul.kaye@york.ac.uk](mailto:paul.kaye@york.ac.uk))

676

677 *Materials Availability*

678 RE9H luciferase-expressing *L. donovani* parasites generated in this study are  
679 available from the Lead Contact or Elmarie Myburgh with a completed Materials  
680 Transfer Agreement.

681

682 *Data and Code Availability*

683 The sequencing data reported in this paper have been deposited in the GEO  
684 database under the accession code GEO: TBC  
685 Code used for analysis (including that for generating Figs from scRNA seq data) in  
686 this study is available at <https://github.com/jipsi/leish-uvb>

687

688 EXPERIMENTAL MODEL AND SUBJECT DETAILS

689 *Mice*

690 8–12-week-old, female C57BL/6J mice (RRID: IMSR\_JAX\_000664), originally  
691 obtained from the Jackson Laboratory were bred in house and maintained under  
692 pathogen free conditions at the Biological Services Facility at the University of York  
693 in accordance with the UK Home Office guidelines under the Animals (Scientific  
694 Procedures) Act 1986 (project licence No. P49487014). Results are reported in  
695 accordance with ARRIVE guidelines (**Supplementary Table S3**).

696

697 *Parasites and Infections*

698 *L. donovani* (LV9; MHOM/ET/67/HU3) was originally isolated from a patient in  
699 Ethiopia in 1967<sup>85</sup> and maintained by passage in B6.CD45.1.*Rag2*<sup>-/-</sup> mice. WT or  
700 luciferase-expressing *L. donovani* parasites were used throughout this study where  
701 indicated. RE9H luciferase-expressing *L. donovani* were generated by transfecting  
702 log-stage promastigotes with linearized pRP-VH plasmid<sup>86</sup> containing a red shifted  
703 luciferase gene (Ppy-RE9H)<sup>87</sup> and selecting with 50 µg mL<sup>-1</sup> G418 (InvivoGen) as  
704 described previously<sup>88</sup>. Passage mice were euthanised and the spleen was excised  
705 into 5mL Roswell Park Memorial Institute medium 1640 (Gibco; Life Technologies;  
706 11875085) supplemented with 100µg/mL penicillin-streptomycin (Gibco; Life

707 Technologies; 10378016) under aseptic conditions. The spleen was then  
708 homogenised using a glass tissue grinder and the cell suspension was centrifuged in  
709 a Heraeus Multifuge 3SR Plus (Thermo Scientific Heraeus®; 75004371) at 800rpm  
710 at 37°C for 5 minutes. The supernatant was transferred to a new tube and the pellet  
711 was discarded. The supernatant was then centrifuged at 3100rpm at 37°C for 10  
712 minutes. The supernatant was discarded and the pellet was resuspended in 1mL of  
713 sterile ACK Lysing Buffer (Lonza; 10-548E) and incubated at 25°C for 5 minutes.  
714 49mL of sterile RPMI/PS was then added and parasites were then centrifuged at  
715 3100rpm at 37°C for 10 minutes. This wash with sterile RPMI/PS was completed  
716 three times. After the final wash, the supernatant was discarded and the pellet was  
717 resuspended in 1mL of sterile RPMI/PS. The parasite suspension was then taken up  
718 through a BD Microlance 3 needle (25G x 5/18" (BD; 300600) on a 1mL syringe (BD  
719 Plastipak; 303172) and dispensed 10 times to remove clumps. Amastigotes were  
720 then counted on a Thoma Counter (depth 0.2mm 1/400mm<sup>2</sup>, Weber England) and  
721 the following formula: (raw count/16) x 2x10<sup>7</sup> was used to determine the  
722 concentration of the parasite suspension (parasites/mL). All mice were infected with  
723 a standard dose of 3x10<sup>7</sup> parasites in 100µL i.v. via the lateral tail vein. Cage  
724 positions were shuffled daily within experimental racks.

725

726

## 727 METHODS DETAILS

### 728 *Cell preparation and flow cytometry: Skin*

729 Mice were shaved using a WELLA CONTURA HS61 Hair Clipper (Wella; HS61).  
730 Mouse flank skin (25mm x 25mm piece) was then collected into 5mL of 3% FBS.  
731 Subcutis layer (sub-cutaneous fat layer) removed by scraping with a rounded-edge  
732 scalpel (Swann Morton; 21-ref0507 and 11-ref0503) and rinsed with 3% FCS. Skin  
733 then minced into small pieces and transferred to a 5mL solution containing 3mg/mL  
734 Collagenase IV (Gibco; 17104-019) and 0.1mg/mL Dnase I (PanReac AppliChem,  
735 P120907) in RPMI1640 (Gibco; 11875085) + 10% FBS (HyClone™ Fetal Bovine  
736 Serum, South American Origin; GE healthcare Life Sciences; SV30160.03). Skin  
737 tissue was incubated for 2 hours at 37°C and then passed through a 40µM cell  
738 strainer and washed with 20mL of RPMI/PS. Skin single cell suspension was then  
739 centrifuged at 1700rpm for 10 minutes at 4°C, supernatant discarded and cell pellet

740 resuspended in 200 $\mu$ L of MACS buffer, filtered through a 40 $\mu$ M cell strainer (Greiner  
741 bio-one; 542040) and transferred to a 96 U-well bottom plate (Sarstedt; 82.1582.001)  
742 for flow cytometric analysis or processed for scRNA-Seq.

743

#### 744 *Cell preparation and flow cytometry: Spleen*

745 For each mouse, the spleen was excised, weight was recorded in grams and  
746 collected into 10mL of 3% FBS in PBS. The spleen was dissociated through a  
747 100 $\mu$ M cell strainer (Greiner bio-one; 542000) using the plunger end of a 5mL  
748 syringe (BD; 307731) and collected into a petri dish. Splenocyte single cell  
749 suspension was then transferred to a 15mL tube using a Pasteur pipette (SLS;  
750 325685). Single cell suspension was then centrifuged at 1300rpm for 6 minutes at  
751 4°C. Supernatants were discarded and cell pellet was resuspended in 1mL of ACK  
752 Lysis buffer (Lonza; 10-548E) and incubated at room temperature for 7 minutes.  
753 Samples were then washed with 9mL of 3% FBS and centrifuged at 1300rpm for 6  
754 minutes at 4°C. Supernatants were discarded and cell pellet resuspended in 10mL of  
755 MACS buffer. 200 $\mu$ L of this single cell suspension was then transferred to a 96 U-  
756 well bottom plate (Sarstedt; 82.1582.001) for flow cytometric analysis.

757

#### 758 *Flow cytometric staining*

759 Samples were first blocked with Fc block for 10 minutes at 4°C incubated. Samples  
760 were then washed with MACS buffer (5mM EDTA, 0.01% FCS in PBS) and  
761 subsequently incubated with primary antibodies for 30 minutes at 37°C. Samples  
762 were then washed twice with MACS buffer and then acquired on a CytoFlex LX 375  
763 (Beckman-Coulter) flow cytometer and FCS files were analysed in FCS express 7  
764 Research (DeNovo Software).

765

#### 766 *In vivo imaging*

767 Mice were injected with 15mg/kg of D-luciferin (Syd labs; Cat MB000102-R70170) i.p  
768 and whole body imaged at 5 minutes post injection using field of view D on an IVIS  
769 Illumina XRMS series III (Caliper Life Sciences, PerkinElmer, UK) for 3 minutes.  
770 Mice were subsequently euthanised with CO<sub>2</sub>, shaved and the skin was removed and  
771 placed with the hydrophobic face up and imaged 10 minutes post injection using field  
772 of view C for 3 minutes.



773

774 *Ultraviolet B (UVB) exposure*

775 Mice were shaved 24 hours prior to baseline measurements and first UVB dose. A  
776 UVB narrowband lamp (DermaHealer® compact; UAB Favoriteplus; Lithuania) was  
777 used to administer UVB treatment. The UVB lamp was calibrated using a UV-AB  
778 light meter (Extech-instruments; Model UV505). At 9cm away the UV-AB light meter  
779 measured UVB intensity to be  $0.35\text{mW/cm}^2 = 3.5\text{J/s/m}^2$ . Therefore, a calibrated dose  
780 (at 9cm) of  $500\text{ J/m}^2$  was administered to each mouse 3 times a week for 3 weeks  
781 prior to infection and 3 times a week for 2 weeks after infection <sup>31</sup>.

782

783 *Skin assessment*

784 Skin melanin and erythema were measured using a Mexameter MX-18 probe  
785 (EnviroDerm Services; UK) before UVB treatment and 24 hours post each UVB  
786 treatment session for the duration of the study. Animals were assessed in random  
787 order. The Mexameter MX-18 probe is equipped with LED light sources and a silicon  
788 diode detector for detecting reflected light from the skin. The Mexameter MX-18  
789 measures the intensity of reflected green (568nm), red (660nm) and infrared  
790 (880nm). Melanin and erythema values are shown in one second as index numbers  
791 between 0 and 999. The Mexameter MX18 automatically calculates this as follows  
792 <sup>89</sup>.

793

794 
$$\text{Melanin index} = \frac{500}{\log_5 (\log I_{\text{infrared}} - \log I_{\text{red}}) + 500}$$

795

796

797 
$$\text{Erythema index} = 500 = \log_5 (\log I_{\text{red}} - \log I_{\text{green}}) + 500$$

798

799 *gDNA extractions*

800 6mm skin punch biopsies were collected and stored at  $-80^\circ\text{C}$  until required. gDNA  
801 extractions were performed with the DNeasy Blood & Tissue Kit (Qiagen; 69504) as  
802 per manufacturer's instructions. Briefly, skin punch biopsies were equilibrated to  
803 room temperature and then minced prior to the addition of  $180\mu\text{L}$  of Buffer ATL and  
804  $20\mu\text{L}$  Proteinase K (per sample). Skin samples were then vortexed and incubated at  
805  $56^\circ\text{C}$  overnight (or until the tissue was completely lysed). Washes and elution steps

806 were performed as per manufacturer's instructions. Quality of eluted gDNA was  
807 validated on a Thermo Scientific NanoDrop™ 1000 Spectrophotometer  
808 (ThermoFisher Scientific).

809

#### 810 *qPCR*

811 *Leishmania*-specific kinetoplastid DNA primers used in this study were previously  
812 characterized by <sup>76</sup> (Accession number AF103738) and used at a final concentration  
813 of 200 nM. 2 ng of gDNA were used per reaction (20µL reaction volume). Fast SYBR  
814 Green Master Mix (Applied Biosystems; 4385612) was used as per manufacturer's  
815 instructions. Reactions were run on a QuantStudio 3 system; 96 well, 0.1mL  
816 (ThermoFisher Scientific) with a thermal cycle of 95°C for 20s, a cycling stage of 40  
817 cycles of 95°C for 3s, 60°C for 30s, 95°C for 1s, 60°C for 20s, 95°C for 1s (data read  
818 at final step), followed by the standard melt curve stage. Data was analysed by  
819 ThermoFisher Connect cloud analysis software (ThermoFisher Scientific).

820

#### 821 *FFPE*

822 8mm biopsy punches of skin were collected into 4% PFA and stored at 4°C for 8  
823 hours and then paraffin embedded in histosette I tissue processing/embedding  
824 cassettes (Simport; M490-5) on the Leica ASP300S Fully Enclosed Tissue Processor  
825 (Leica Biosystems) and embedded on the Leica EG1150 H Modular Tissue  
826 Embedding Center (Leica Biosystems).

827

#### 828 *H&E*

829 Blocks were chilled prior to sectioning. 7µM sections were cut on a Leica Wax  
830 Microtome and placed into a water bath set to 45°C for 15 seconds. Sections were  
831 then collected onto Superfrost slides (ThermoScientific; J1800AMNZ) and allowed to  
832 dry overnight at RT. Slides heat fixed at 60°C for 2 hours in a sterilising oven  
833 (Leader Engineering; GP/30/SS/250/HYD, 08H028). Slides were allowed to cool  
834 down and then deparafinised with HistoClear II (SLS; NAT1334) for 5 minutes. Slides  
835 were equilibrated in 95% Ethanol for 3 minutes, 70% Ethanol for 3 minutes and  
836 distilled water for 3 minutes. Slides were then stained in Harris Haematoxylin  
837 (ThermoScientific; 6765001) for 3 minutes and then rinsed in tepid water for 5  
838 minutes. Slides were dipped once in 1% acid-alcohol (HCl-EtOH; Sigma; 30721-

839 2.5L-M; Fisher Scientific; E/0650DF/C17) and then equilibrated in distilled water for 3  
840 minutes. Slides were then stained with 1% Eosin (Sigma-Aldrich; E4382-25G) for 3  
841 minutes and then dipped in 50% Ethanol 10 times. Slides were then equilibrated in  
842 70% Ethanol for 3 minutes, 95% Ethanol for 3 minutes and 100% Ethanol for 3  
843 minutes. Slides were then cleared in HistoClear II (SLS; NAT1334) for 9 minutes.  
844 Slides were then mounted with Dibutylphthalate Polystyrene Xylene (DPX; Sigma-  
845 Aldrich; 06522-500ML) and coverslipped with 22 x 50 mm cover slips (SLS;  
846 MIC3226). Slides were dried overnight before scanned on the Zeiss Axioscan Z1  
847 (Zeiss).

848

#### 849 *Single cell isolation for scRNA-Seq*

850 Skin tissue processed as above and dead cells removed using the dead cell removal  
851 kit (Miltenyi; 130-090-101) as per manufacturer's instructions. An aliquot was taken  
852 and stained with CD45 and live/dead antibodies to check viability prior to library  
853 preparation.

854

#### 855 *Single cell library preparation*

856 Eluted cells after dead cell removal were washed in dPBS containing 0.04% BSA  
857 and resuspended at a concentration of approximately 1000 cells/ $\mu$ L. Library  
858 preparation was then performed following the Chromium Next GEM Single Cell 3' Kit  
859 v 3.1 (10X Genomics; following the CG000315 Rev A user guide), where 10,000  
860 cells are targeted for capture. Each library was sequenced on the Illumina NovaSeq  
861 6000 platform, to achieve a minimum of approximately 20,000 reads sets per cell.

862

#### 863 *Visium whole transcriptome spatial transcriptomics and processing*

864 FFPE sections from non-infected -UVB, *L. donovani* infected -UVB and *L. donovani*  
865 infected +UVB mice (3 per group; total n=9) were cut onto 10X Genomics Visium  
866 slides and processed according to the Visium Spatial Gene Expression Reagent Kits  
867 for FFPE recommended protocol v1 (10X Genomics). Briefly, slides were stained  
868 with hematoxylin and eosin, imaged, and de-crosslinked. Mouse probes were added  
869 overnight and then extended and released. Libraries were prepared according to  
870 the manufacturer's instructions and sequenced using the NovaSeq 6000 platform.  
871 Raw fastq files were aligned to the mouse genome mm10 using spaceranger  
872 software (10x Genomics). Associated image files were aligned onto slide specific

873 fiducials using Loupe browser software (10X Genomics). Tissue regions were  
874 manually selected and a tissue x,y co-ordinate json file was created. Json files and  
875 image files were provided as input to the spaceranger count() function to generate  
876 counts and align them to spatial spots. Raw counts were normalised and analysed  
877 further. Gene expression enrichment in spatial spots were calculated using the  
878 AddModuleScore() function in Seurat and score greater than 0 was considered a  
879 positive score.

880

#### 881 *Processing and quality control of scRNA-Seq data*

882 FASTQ files were aligned using 10x Genomics Cell Ranger 6.1.0. Each library was  
883 aligned to an indexed mm10 genome using Cell Ranger Count. Generated .h5 files  
884 were loaded as Seurat objects <sup>78</sup> and quality controlled by removing cells with more  
885 than 10% mitochondrial reads. Cells were visualised as a scatter plot to visualise  
886 feature-feature relationships and subset accordingly. Counts for  
887 *Gm42418* and *AY036118* were removed from the samples these transcripts may  
888 represent library amplification noise <sup>90</sup>. Next, each sample was regressed for  
889 ribosomal genes, mitochondrial reads, total RNA count, unique feature count using  
890 SCTransform() in Seurat using Gamma-Poisson generalised linear models,  
891 specifically, the method glmGamPoi (R package) <sup>91</sup>. Finally, anchors for all samples  
892 were calculated using SelectIntegrationFeatures() and FindIntegrationAnchors() to  
893 integrate all groups into one integrated object.

894

#### 895 *Dimensionality reduction and clustering analysis of scRNA-Seq data*

896 First, principal components analysis was done to reduce the data into fewer  
897 dimensions. The top 15 principal components that explained most of the variance in  
898 the data were selected for downstream analysis. Low resolution Louvain clustering  
899 was used at a resolution of 0.4 to identify 16 clusters that were visualised using  
900 scatter plots either on principal component 1 and 2 or in UMAP space. Macrophage,  
901 T\_NK, endothelial and LEC/LV cells were subset and re-clustered by repeating the  
902 above procedure to find further granularity in cellular phenotype. Comparison  
903 between cell types and groups were carried out by calculating differentially  
904 expressed genes using Wilcoxon-Rank sum test as employed in the

905 FindAllMarkers() or FindMarkers() function in Seurat. Genes with p-values higher  
906 than 0.05 were discarded.

907

### 908 *Ligand-receptor interaction*

909 Interactions between cell types were calculated using the R package Cellchat<sup>50</sup> that  
910 assigns a probability to each interaction and then conducts a permutation test. The  
911 interactions are based on a database of curated known interactions. We used a  
912 subset of interactions, namely, those falling under “secreted signalling” and “cell-to-  
913 cell contact” to model interaction network with a total of 1,073 interactions available  
914 to review on <http://www.cellchat.org/>. Finally, the L-R interactions were modelled  
915 based on law of mass action. Only significant interactions were presented.

916

### 917 *Spatial cell type de-convolution and graph-based clustering*

918 Cell2location was used to de-convolute cell type per Visium spatial spot using the  
919 hyperparameters N\_cells\_per\_location=30, detection\_alpha=20 using our own single  
920 cell RNA seq data set (this paper). First, the reference cell type signatures were  
921 estimated using a negative binomial regression model by training the model for  
922 1,000 epochs. The reference signature model was then used to deconvolute the  
923 spatial data with abovementioned hyperparameters by training cell2location model  
924 for 30,000 epochs. Finally the 5% quantile of the posterior distribution wherein the  
925 model has high confidence was used to infer the value of cell abundance per spatial  
926 spot. Next, the abundances were subset for a selection of cells that were most  
927 abundant by removing all cell types whose max value was lower than the median of  
928 all the max values calculated per cell type. The abundances were then used to  
929 generate a correlation matrix which was then used as a distance matrix (1-corr) to  
930 create a graph. A minimum spanning tree was calculated to obtain the shortest  
931 distance between the graph and clusters were calculated using edge.betweenness.

932

### 933 *STRING and GSEA*

934 Differentially expressed gene names were submitted to StringDB (<https://string->  
935 [db.org/](https://string-db.org/)). The full STRING network (the edges indicate both functional and physical  
936 protein associations) was selected for the analysis. All default interaction sources  
937 with a medium confidence interaction score of 0.4 were selected (text-mining was  
938 excluded from the analysis). Gene set enrichment analysis (GSEA) was conducted

939 using HALLMARK gene lists (<https://www.gsea-msigdb.org/gsea/index.jsp>) and the  
940 calculated FDR q-value was converted to  $-\text{LOG}_{10}(\text{FDR})$  for presentation purposes.

941

## 942 QUANTIFICATION AND STATISTICAL ANALYSIS

943 Animals were reandomised to treatment groups. Downstream data analysis was  
944 unblinded and conducted using quantitative methodologies as described above. No  
945 animals or data points were excluded from the analysis. Statistical analyses were  
946 performed in Prism 9 (v9.01; GraphPad Software). Data were tested for normality  
947 using the D-Agostino & Pearson method. Data are presented as the mean  $\pm$  SEM or  
948 the median  $\pm$  IQR as indicated. Power calculations (type I/II error rate, where  $\alpha =$   
949 0.05 and power = 80%) determined the sample size to include 5 mice per group.  
950 Sample sizes in each plot has been listed in the Fig. Legends where appropriate. P  
951 values are shown as \* $p < 0.05$ , \*\* $p < 0.01$ , \*\*\* $p < 0.001$  and \*\*\*\* $p < 0.0001$ . Groups  
952 with two or more dependent variables were compared using a One-Way ANOVA  
953 with Tukey's multiple comparisons test or a Two-Way ANOVA with Sidak's multiple  
954 comparisons test.

955

956

957 REFERENCES

958

- 959 1 Kamhawi, S. & Serafim, T. D. Patchy Parasitized Skin Governs Leishmania  
960 donovani Transmission to Sand Flies. *Trends Parasitol* **33**, 748-750,  
961 doi:10.1016/j.pt.2017.08.004 (2017).
- 962 2 Capewell, P. *et al.* The skin is a significant but overlooked anatomical  
963 reservoir for vector-borne African trypanosomes. *Elife* **5**,  
964 doi:10.7554/eLife.17716 (2016).
- 965 3 Camara, M. *et al.* Extravascular Dermal Trypanosomes in Suspected and  
966 Confirmed Cases of gambiense Human African Trypanosomiasis. *Clin Infect*  
967 *Dis* **73**, 12-20, doi:10.1093/cid/ciaa897 (2021).
- 968 4 Ward, A. I. *et al.* In Vivo Analysis of Trypanosoma cruzi Persistence Foci at  
969 Single-Cell Resolution. *mBio* **11**, doi:10.1128/mBio.01242-20 (2020).
- 970 5 Doehl, J. S. P. *et al.* Skin parasite landscape determines host infectiousness  
971 in visceral leishmaniasis. *Nature Communications* **8**, 57, doi:10.1038/s41467-  
972 017-00103-8 (2017).
- 973 6 Cloots, K. *et al.* Assessing L. donovani Skin Parasite Load: A Proof of  
974 Concept Study of a Microbiopsy Device in an Indian Setting. *Frontiers in*  
975 *Cellular and Infection Microbiology* **11**, doi:10.3389/fcimb.2021.645121  
976 (2021).
- 977 7 Scorza, B. M. *et al.* Leishmania infantum xenodiagnosis from vertically  
978 infected dogs reveals significant skin tropism. *PLOS Neglected Tropical*  
979 *Diseases* **15**, e0009366, doi:10.1371/journal.pntd.0009366 (2021).
- 980 8 Borja, L. S. *et al.* Parasite load in the blood and skin of dogs naturally infected  
981 by Leishmania infantum is correlated with their capacity to infect sand fly  
982 vectors. *Veterinary Parasitology* **229**, 110-117,  
983 doi:<https://doi.org/10.1016/j.vetpar.2016.10.004> (2016).
- 984 9 Verçosa, B. L. A. *et al.* Transmission potential, skin inflammatory response,  
985 and parasitism of symptomatic and asymptomatic dogs with visceral  
986 leishmaniasis. *BMC Veterinary Research* **4**, 45, doi:10.1186/1746-6148-4-45  
987 (2008).
- 988 10 De Rycker, M., Wyllie, S., Horn, D., Read, K. D. & Gilbert, I. H. Anti-  
989 trypanosomatid drug discovery: progress and challenges. *Nat Rev Microbiol*  
990 **21**, 35-50, doi:10.1038/s41579-022-00777-y (2023).
- 991 11 Mohrin, M. & Jasper, H. Exploring Human Skin Aging at the Single-Cell Level.  
992 *Dev Cell* **56**, 253-254, doi:10.1016/j.devcel.2021.01.006 (2021).
- 993 12 Zou, Z. *et al.* A Single-Cell Transcriptomic Atlas of Human Skin Aging. *Dev*  
994 *Cell* **56**, 383-397.e388, doi:10.1016/j.devcel.2020.11.002 (2021).
- 995 13 Vu, R. *et al.* Wound healing in aged skin exhibits systems-level alterations in  
996 cellular composition and cell-cell communication. *Cell Reports* **40**, 111155,  
997 doi:<https://doi.org/10.1016/j.celrep.2022.111155> (2022).
- 998 14 Reynolds, G. *et al.* Developmental cell programs are co-opted in inflammatory  
999 skin disease. *Science* **371**, eaba6500, doi:10.1126/science.aba6500 (2021).
- 1000 15 Theocharidis, G., Tekkela, S., Veves, A., McGrath, J. A. & Onoufriadis, A.  
1001 Single-cell transcriptomics in human skin research: available technologies,  
1002 technical considerations and disease applications. *Exp Dermatol* **31**, 655-673,  
1003 doi:10.1111/exd.14547 (2022).
- 1004 16 Chen, Y. E., Fischbach, M. A. & Belkaid, Y. Skin microbiota-host interactions.  
1005 *Nature* **553**, 427-436, doi:10.1038/nature25177 (2018).

- 1006 17 Park, Y. J., Kang, B. H., Kim, H. J., Oh, J. E. & Lee, H. K. A Microbiota-  
1007 Dependent Subset of Skin Macrophages Protects Against Cutaneous  
1008 Bacterial Infection. *Front Immunol* **13**, 799598,  
1009 doi:10.3389/fimmu.2022.799598 (2022).
- 1010 18 Bernard, J. J., Gallo, R. L. & Krutmann, J. Photoimmunology: how ultraviolet  
1011 radiation affects the immune system. *Nature Reviews Immunology* **19**, 688-  
1012 701, doi:10.1038/s41577-019-0185-9 (2019).
- 1013 19 De Fabo, E. C. Arctic stratospheric ozone depletion and increased UVB  
1014 radiation: potential impacts to human health. *International Journal of*  
1015 *Circumpolar Health* **64**, 509-522, doi:10.3402/ijch.v64i5.18032 (2005).
- 1016 20 Poon, T. S., Barnetson, R. S. & Halliday, G. M. Sunlight-induced  
1017 immunosuppression in humans is initially because of UVB, then UVA,  
1018 followed by interactive effects. *J Invest Dermatol* **125**, 840-846,  
1019 doi:10.1111/j.0022-202X.2005.23894.x (2005).
- 1020 21 Vacharanukrauh, P. *et al.* Transcriptome profiling in psoriasis: NB-UVB  
1021 treatment-associated transcriptional changes and modulation of  
1022 autoinflammation in perilesional skin in early-phase disease. *J Dermatol Sci*  
1023 **107**, 123-132, doi:10.1016/j.jdermsci.2022.08.004 (2022).
- 1024 22 Li, S. *et al.* UVB Drives Metabolic Rewiring and Epigenetic Reprogramming and  
1025 Protection by Sulforaphane in Human Skin Keratinocytes. *Chem Res Toxicol*  
1026 **35**, 1220-1233, doi:10.1021/acs.chemrestox.1c00432 (2022).
- 1027 23 Bauwens, E. *et al.* Senescence Induced by UVB in Keratinocytes Impairs  
1028 Amino Acids Balance. *J Invest Dermatol*, doi:10.1016/j.jid.2022.11.017  
1029 (2022).
- 1030 24 Lin, Y. *et al.* Single-cell RNA-seq of UVB-radiated skin reveals landscape of  
1031 photoaging-related inflammation and protection by vitamin D. *Gene* **831**,  
1032 146563, doi:10.1016/j.gene.2022.146563 (2022).
- 1033 25 Yang, Y. *et al.* UVB drives different stages of epigenome alterations during  
1034 progression of skin cancer. *Cancer Lett* **449**, 20-30,  
1035 doi:10.1016/j.canlet.2019.02.010 (2019).
- 1036 26 Giannini, M. S. Suppression of pathogenesis in cutaneous leishmaniasis by  
1037 UV irradiation. *Infect Immun* **51**, 838-843, doi:10.1128/iai.51.3.838-843.1986  
1038 (1986).
- 1039 27 Khaskhely, N. M. *et al.* Low-dose UVB contributes to host resistance against  
1040 *Leishmania amazonensis* infection in mice through induction of gamma  
1041 interferon and tumor necrosis factor alpha cytokines. *Clin Diagn Lab Immunol*  
1042 **9**, 677-686, doi:10.1128/cdli.9.3.677-686.2002 (2002).
- 1043 28 Ismail, A. *et al.* The pathogenesis of post kala-azar dermal leishmaniasis from  
1044 the field to the molecule: Does ultraviolet light (UVB) radiation play a role?  
1045 *Medical Hypotheses* **66**, 993-999,  
1046 doi:<https://doi.org/10.1016/j.mehy.2005.03.035> (2006).
- 1047 29 Le Rutte, E. A., Zijlstra, E. E. & de Vlas, S. J. Post-Kala-Azar Dermal  
1048 Leishmaniasis as a Reservoir for Visceral Leishmaniasis Transmission.  
1049 *Trends Parasitol* **35**, 590-592, doi:10.1016/j.pt.2019.06.007 (2019).
- 1050 30 Mukhopadhyay, D., Dalton, J. E., Kaye, P. M. & Chatterjee, M. Post kala-azar  
1051 dermal leishmaniasis: an unresolved mystery. *Trends Parasitol* **30**, 65-74,  
1052 doi:10.1016/j.pt.2013.12.004 (2014).
- 1053 31 el-Ghorr, A. A., Norval, M., Lappin, M. B. & Crosby, J. C. The effect of chronic  
1054 low-dose UVB radiation on Langerhans cells, sunburn cells, urocanic acid  
1055 isomers, contact hypersensitivity and serum immunoglobulins in mice.



- 1056 *Photochem Photobiol* **62**, 326-332, doi:10.1111/j.1751-1097.1995.tb05276.x  
1057 (1995).
- 1058 32 Gyöngyösi, N. *et al.* Photosensitivity of murine skin greatly depends on the  
1059 genetic background: clinically relevant dose as a new measure to replace  
1060 minimal erythema dose in mouse studies. *Exp Dermatol* **25**, 519-525,  
1061 doi:10.1111/exd.12984 (2016).
- 1062 33 GmbH, C. K. e. 14 (Courage + Khazaka electronic GmbH Germany, 2020).  
1063 34 Joost, S. *et al.* The Molecular Anatomy of Mouse Skin during Hair Growth and  
1064 Rest. *Cell Stem Cell* **26**, 441-457.e447, doi:10.1016/j.stem.2020.01.012  
1065 (2020).
- 1066 35 Haensel, D. *et al.* Defining Epidermal Basal Cell States during Skin  
1067 Homeostasis and Wound Healing Using Single-Cell Transcriptomics. *Cell*  
1068 *Reports* **30**, 3932-3947.e3936, doi:10.1016/j.celrep.2020.02.091 (2020).
- 1069 36 Boro, M. & Balaji, K. N. CXCL1 and CXCL2 Regulate NLRP3 Inflammasome  
1070 Activation via G-Protein–Coupled Receptor CXCR2. *The Journal of*  
1071 *Immunology* **199**, 1660-1671, doi:10.4049/jimmunol.1700129 (2017).
- 1072 37 Subramanian, A. *et al.* Gene set enrichment analysis: A knowledge-based  
1073 approach for interpreting genome-wide expression profiles. *Proceedings of*  
1074 *the National Academy of Sciences* **102**, 15545-15550,  
1075 doi:doi:10.1073/pnas.0506580102 (2005).
- 1076 38 Chatterjee, J. *et al.* Asthma reduces glioma formation by T cell decorin-  
1077 mediated inhibition of microglia. *Nature Communications* **12**, 7122,  
1078 doi:10.1038/s41467-021-27455-6 (2021).
- 1079 39 Dai, H., Wang, L., Li, L., Huang, Z. & Ye, L. Metallothionein 1: A New  
1080 Spotlight on Inflammatory Diseases. *Front Immunol* **12**, 739918,  
1081 doi:10.3389/fimmu.2021.739918 (2021).
- 1082 40 Gupta, G. *et al.* The Long Pentraxin 3 (PTX3) Suppresses Immunity to  
1083 Cutaneous Leishmaniasis by Regulating CD4+ T Helper Cell Response. *Cell*  
1084 *Reports* **33**, 108513, doi:<https://doi.org/10.1016/j.celrep.2020.108513> (2020).
- 1085 41 Zukauskas, A. *et al.* TM4SF1: a tetraspanin-like protein necessary for  
1086 nanopodia formation and endothelial cell migration. *Angiogenesis* **14**, 345-  
1087 354, doi:10.1007/s10456-011-9218-0 (2011).
- 1088 42 Lucas, T. M., Richner, J. M. & Diamond, M. S. The Interferon-Stimulated  
1089 Gene Irf2l2 Restricts West Nile Virus Infection and Pathogenesis in a Cell-  
1090 Type- and Region-Specific Manner. *Journal of Virology* **90**, 2600-2615,  
1091 doi:doi:10.1128/JVI.02463-15 (2016).
- 1092 43 Hosseini, M. *et al.* Energy Metabolism Rewiring Precedes UVB-Induced  
1093 Primary Skin Tumor Formation. *Cell Reports* **23**, 3621-3634,  
1094 doi:<https://doi.org/10.1016/j.celrep.2018.05.060> (2018).
- 1095 44 Yang, X. *et al.* Metabolomics study of fibroblasts damaged by UVB and BaP.  
1096 *Sci Rep* **11**, 11176, doi:10.1038/s41598-021-90186-7 (2021).
- 1097 45 Ibrahim, A. M. *et al.* Diverse Macrophage Populations Contribute to the  
1098 Inflammatory Microenvironment in Premalignant Lesions During Localized  
1099 Invasion. *Front Oncol* **10**, 569985, doi:10.3389/fonc.2020.569985 (2020).
- 1100 46 Dick, S. A. *et al.* Three tissue resident macrophage subsets coexist across  
1101 organs with conserved origins and life cycles. *Science Immunology* **7**,  
1102 eabf7777, doi:doi:10.1126/sciimmunol.abf7777 (2022).
- 1103 47 Lei, L. *et al.* MALAT1 participates in ultraviolet B-induced photo-aging via  
1104 regulation of the ERK/MAPK signaling pathway. *Mol Med Rep* **15**, 3977-3982,  
1105 doi:10.3892/mmr.2017.6532 (2017).

- 1106 48 Nayar, S. *et al.* Immunofibroblasts are pivotal drivers of tertiary lymphoid  
1107 structure formation and local pathology. *Proceedings of the National Academy*  
1108 *of Sciences* **116**, 13490-13497, doi:doi:10.1073/pnas.1905301116 (2019).
- 1109 49 Asai, J. The Role of Podoplanin in Skin Diseases. *Int J Mol Sci* **23**,  
1110 doi:10.3390/ijms23031310 (2022).
- 1111 50 Jin, S. *et al.* Inference and analysis of cell-cell communication using CellChat.  
1112 *Nature Communications* **12**, 1088, doi:10.1038/s41467-021-21246-9 (2021).
- 1113 51 Kleshchevnikov, V. *et al.* Cell2location maps fine-grained cell types in spatial  
1114 transcriptomics. *Nat Biotechnol* **40**, 661-671, doi:10.1038/s41587-021-01139-  
1115 4 (2022).
- 1116 52 Davidson, S. *et al.* Single-Cell RNA Sequencing Reveals a Dynamic Stromal  
1117 Niche That Supports Tumor Growth. *Cell Rep* **31**, 107628,  
1118 doi:10.1016/j.celrep.2020.107628 (2020).
- 1119 53 Miragaia, R. J. *et al.* Single-Cell Transcriptomics of Regulatory T Cells  
1120 Reveals Trajectories of Tissue Adaptation. *Immunity* **50**, 493-504.e497,  
1121 doi:10.1016/j.immuni.2019.01.001 (2019).
- 1122 54 Guerrero-Juarez, C. F. *et al.* Single-cell analysis reveals fibroblast  
1123 heterogeneity and myeloid-derived adipocyte progenitors in murine skin  
1124 wounds. *Nature Communications* **10**, 650, doi:10.1038/s41467-018-08247-x  
1125 (2019).
- 1126 55 Joost, S. *et al.* Single-Cell Transcriptomics of Traced Epidermal and Hair  
1127 Follicle Stem Cells Reveals Rapid Adaptations during Wound Healing. *Cell*  
1128 *Reports* **25**, 585-597.e587, doi:<https://doi.org/10.1016/j.celrep.2018.09.059>  
1129 (2018).
- 1130 56 Schaum, N. *et al.* Single-cell transcriptomics of 20 mouse organs creates a  
1131 Tabula Muris. *Nature* **562**, 367-372, doi:10.1038/s41586-018-0590-4 (2018).
- 1132 57 Joost, S. *et al.* Single-Cell Transcriptomics Reveals that Differentiation and  
1133 Spatial Signatures Shape Epidermal and Hair Follicle Heterogeneity. *Cell*  
1134 *Systems* **3**, 221-237.e229, doi:<https://doi.org/10.1016/j.cels.2016.08.010>  
1135 (2016).
- 1136 58 Cotterell, S. E., Engwerda, C. R. & Kaye, P. M. Enhanced hematopoietic  
1137 activity accompanies parasite expansion in the spleen and bone marrow of  
1138 mice infected with *Leishmania donovani*. *Infect Immun* **68**, 1840-1848,  
1139 doi:10.1128/iai.68.4.1840-1848.2000 (2000).
- 1140 59 Romano, A. *et al.* Interferon- $\gamma$ -Producing CD4(+) T Cells Drive Monocyte  
1141 Activation in the Bone Marrow During Experimental *Leishmania donovani*  
1142 Infection. *Front Immunol* **12**, 700501, doi:10.3389/fimmu.2021.700501 (2021).
- 1143 60 Buckley, C. D., Rainger, G. E., Nash, G. B. & Raza, K. Endothelial cells,  
1144 fibroblasts and vasculitis. *Rheumatology* **44**, 860-863,  
1145 doi:10.1093/rheumatology/keh542 (2005).
- 1146 61 Korsunsky, I. *et al.* Cross-tissue, single-cell stromal atlas identifies shared  
1147 pathological fibroblast phenotypes in four chronic inflammatory diseases. *Med*  
1148 **3**, 481-518.e414, doi:10.1016/j.medj.2022.05.002 (2022).
- 1149 62 McEver, R. P. Selectins: initiators of leucocyte adhesion and signalling at the  
1150 vascular wall. *Cardiovascular Research* **107**, 331-339, doi:10.1093/cvr/cvv154  
1151 (2015).
- 1152 63 Yukami, T. *et al.* Endothelial selectins regulate skin wound healing in  
1153 cooperation with L-selectin and ICAM-1. *Journal of Leukocyte Biology* **82**,  
1154 519-531, doi:<https://doi.org/10.1189/jlb.0307152> (2007).

- 1155 64 Grailer, J. J., Kodera, M. & Steeber, D. A. L-selectin: role in regulating  
1156 homeostasis and cutaneous inflammation. *J Dermatol Sci* **56**, 141-147,  
1157 doi:10.1016/j.jdermsci.2009.10.001 (2009).
- 1158 65 Subramaniam, M. *et al.* Role of endothelial selectins in wound repair. *Am J*  
1159 *Pathol* **150**, 1701-1709 (1997).
- 1160 66 San Martin, R. *et al.* Recruitment of CD34+ Fibroblasts in Tumor-Associated  
1161 Reactive Stroma: The Reactive Microvasculature Hypothesis. *Am J Pathol*  
1162 **184**, 1860-1870, doi:<https://doi.org/10.1016/j.ajpath.2014.02.021> (2014).
- 1163 67 Asa, D. *et al.* The P-selectin Glycoprotein Ligand Functions as a Common  
1164 Human Leukocyte Ligand for P- and E-selectins\*. *Journal of Biological*  
1165 *Chemistry* **270**, 11662-11670, doi:<https://doi.org/10.1074/jbc.270.19.11662>  
1166 (1995).
- 1167 68 Doehl, J. S. P. *et al.* Spatial Point Pattern Analysis Identifies Mechanisms  
1168 Shaping the Skin Parasite Landscape in *Leishmania donovani* Infection. *Front*  
1169 *Immunol* **12**, 795554, doi:10.3389/fimmu.2021.795554 (2021).
- 1170 69 Lee, S. H. *et al.* Mannose receptor high, M2 dermal macrophages mediate  
1171 nonhealing *Leishmania major* infection in a Th1 immune environment. *J Exp*  
1172 *Med* **215**, 357-375, doi:10.1084/jem.20171389 (2018).
- 1173 70 Assassi, S. *et al.* Skin Gene Expression Correlates of Severity of Interstitial  
1174 Lung Disease in Systemic Sclerosis. *Arthritis & Rheumatism* **65**, 2917-2927,  
1175 doi:<https://doi.org/10.1002/art.38101> (2013).
- 1176 71 Zijlstra, E. E., Alves, F., Rijal, S., Arana, B. & Alvar, J. Post-kala-azar dermal  
1177 leishmaniasis in the Indian subcontinent: A threat to the South-East Asia  
1178 Region Kala-azar Elimination Programme. *PLoS Negl Trop Dis* **11**, e0005877,  
1179 doi:10.1371/journal.pntd.0005877 (2017).
- 1180 72 Khalil, E. A. *et al.* Post-Kala-Azar Dermal Leishmaniasis: A Paradigm of  
1181 Paradoxical Immune Reconstitution Syndrome in Non-HIV/AIDS Patients. *J*  
1182 *Trop Med* **2013**, 275253, doi:10.1155/2013/275253 (2013).
- 1183 73 Syed, D. N., Afaq, F. & Mukhtar, H. Differential activation of signaling  
1184 pathways by UVA and UVB radiation in normal human epidermal  
1185 keratinocytes. *Photochem Photobiol* **88**, 1184-1190, doi:10.1111/j.1751-  
1186 1097.2012.01115.x (2012).
- 1187 74 Fassbender, S. *et al.* Keratinocytes Counteract UVB-Induced  
1188 Immunosuppression in Mice through HIF-1a Signaling. *J Invest Dermatol* **142**,  
1189 1183-1193, doi:10.1016/j.jid.2021.07.185 (2022).
- 1190 75 Bertrand-Vallery, V. *et al.* Proteomic Profiling of Human Keratinocytes  
1191 Undergoing UVB-Induced Alternative Differentiation Reveals TRIPartite Motif  
1192 Protein 29 as a Survival Factor. *PLOS ONE* **5**, e10462,  
1193 doi:10.1371/journal.pone.0010462 (2010).
- 1194 76 Bezerra-Vasconcelos, D. R., Melo, L. M., Albuquerque, É. S., Luciano, M. C.  
1195 S. & Bevilacqua, C. M. L. Real-time PCR to assess the *Leishmania* load in  
1196 *Lutzomyia longipalpis* sand flies: Screening of target genes and assessment  
1197 of quantitative methods. *Experimental Parasitology* **129**, 234-239,  
1198 doi:<https://doi.org/10.1016/j.exppara.2011.08.010> (2011).
- 1199 77 Bankhead, P. *et al.* QuPath: Open source software for digital pathology image  
1200 analysis. *Scientific Reports* **7**, 16878, doi:10.1038/s41598-017-17204-5  
1201 (2017).
- 1202 78 Butler, A., Hoffman, P., Smibert, P., Papalexi, E. & Satija, R. Integrating  
1203 single-cell transcriptomic data across different conditions, technologies, and  
1204 species. *Nature Biotechnology* **36**, 411-420, doi:10.1038/nbt.4096 (2018).

- 1205 79 Oliveros, J. C. *VENNY. An interactive tool for comparing lists with Venn*  
1206 *Diagrams*, <<https://bioinfogp.cnb.csic.es/tools/venny/index.html>> (2007).
- 1207 80 R: A language and environment for statistical  
1208 computing. (R Foundation for Statistical Computing, Vienna, Austria, 2021).
- 1209 81 RStudio: Integrated Development for R (RStudio PBC, Boston MA, USA,  
1210 2020).
- 1211 82 Szklarczyk, D. *et al.* The STRING database in 2021: customizable protein-  
1212 protein networks, and functional characterization of user-uploaded  
1213 gene/measurement sets. *Nucleic Acids Res* **49**, D605-d612,  
1214 doi:10.1093/nar/gkaa1074 (2021).
- 1215 83 Snel, B., Lehmann, G., Bork, P. & Huynen, M. A. STRING: a web-server to  
1216 retrieve and display the repeatedly occurring neighbourhood of a gene.  
1217 *Nucleic Acids Res* **28**, 3442-3444, doi:10.1093/nar/28.18.3442 (2000).
- 1218 84 Szklarczyk, D. *et al.* STRING v11: protein-protein association networks with  
1219 increased coverage, supporting functional discovery in genome-wide  
1220 experimental datasets. *Nucleic Acids Res* **47**, D607-d613,  
1221 doi:10.1093/nar/gky1131 (2019).
- 1222 85 Bradley, D. J. & Kirkley, J. Regulation of Leishmania populations within the  
1223 host. I. the variable course of Leishmania donovani infections in mice. *Clin*  
1224 *Exp Immunol* **30**, 119-129 (1977).
- 1225 86 Soysa, R., Carter, N. S. & Yates, P. A. A dual luciferase system for analysis of  
1226 post-transcriptional regulation of gene expression in Leishmania. *Mol*  
1227 *Biochem Parasitol* **195**, 1-5, doi:10.1016/j.molbiopara.2014.05.002 (2014).
- 1228 87 Branchini, B. R. *et al.* Red-emitting luciferases for bioluminescence reporter  
1229 and imaging applications. *Analytical Biochemistry* **396**, 290-297,  
1230 doi:<https://doi.org/10.1016/j.ab.2009.09.009> (2010).
- 1231 88 Castanys-Muñoz, E., Brown, E., Coombs, G. H. & Mottram, J. C. Leishmania  
1232 mexicana metacaspase is a negative regulator of amastigote proliferation in  
1233 mammalian cells. *Cell Death Dis* **3**, e385, doi:10.1038/cddis.2012.113 (2012).
- 1234 89 Huang, M.-W., Lo, P.-Y. & Cheng, K.-S. Objective Assessment of Sunburn  
1235 and Minimal Erythema Doses: Comparison of Noninvasive In Vivo Measuring  
1236 Techniques after UVB Irradiation. *EURASIP Journal on Advances in Signal*  
1237 *Processing* **2010**, 483562, doi:10.1155/2010/483562 (2010).
- 1238 90 Kimmel, J. C., Hwang, A. B., Scaramozza, A., Marshall, W. F. & Brack, A. S.  
1239 Aging induces aberrant state transition kinetics in murine muscle stem cells.  
1240 *Development* **147**, doi:10.1242/dev.183855 (2020).
- 1241 91 Ahlmann-Eltze, C. & Huber, W. glmGamPoi: fitting Gamma-Poisson  
1242 generalized linear models on single cell count data. *Bioinformatics* **36**, 5701-  
1243 5702, doi:10.1093/bioinformatics/btaa1009 (2020).
- 1244
